# Supplementary material for: GIPAW Pseudopotentials of d Elements for Solid-State NMR
Source: MDPI journal article supplement (doi:10.3390/ma15093347), 2022-05-06
Supplement: s1 [file s1]

## Article

# Supplementary Information *GIPAW* pseudopotentials of *d*-elements for solid-state NMR

Christian Tantardini <sup>1,2,\*</sup> , Alexander G. Kvashnin <sup>3</sup>  and Davide Ceresoli <sup>4,\*</sup> 

<sup>1</sup> Department of Chemistry, UiT The Arctic University of Norway, P.O. Box 6050 Langnes, N-9037 Tromsø, Norway

<sup>2</sup> Institute of Solid State Chemistry and Mechanochemistry SB RAS, 630128 Novosibirsk, Russia

<sup>3</sup> Skolkovo Institute of Science and Technology, Bolshoy Boulevard 30, bld. 1, 121205 Moscow, Russian; A.Kvashnin@skoltech.ru

<sup>4</sup> CNR-SCITEC, c/o Dipartimento di Chimica, Università degli studi di Milano, via Golgi 19, 20133 Milano, Italy

\* Correspondence: christiantantardini@ymail.com (C.T.); davide.ceresoli@cnr.it (D.C.)

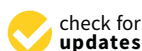

**Citation:** Tantardini, C.; Kvashnin, A.

G.; Ceresoli, D. Supplementary Information *GIPAW* pseudopotentials of *d*-elements for solid-state NMR.

*Materials* **2022**, *15*, 3347.

[https://doi.org/10.3390/](https://doi.org/10.3390/ma15093347)

[ma15093347](https://doi.org/10.3390/ma15093347)

Academic Editor: Alina Pruna

Received: 8 February 2022

Accepted: 27 April 2022

Published: 6 May 2022

**Publisher's Note:** MDPI stays neutral with regard to jurisdictional claims in published maps and institutional affiliations.

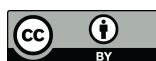

**Copyright:** © 2022 by the authors.

Licensee MDPI, Basel, Switzerland.

This article is an open access article

distributed under the terms and

conditions of the Creative Commons

Attribution (CC BY) license ([https://creativecommons.org/licenses/by/](https://creativecommons.org/licenses/by/4.0/)

[https://creativecommons.org/licenses/by/](https://creativecommons.org/licenses/by/4.0/)

4.0/).

**Table S1.** Table of lattice parameters of 10 fully-relaxed unit cells with developed *GIPAW* pseudopotentials and those optimized with PAW pseudopotentials in VASP code and the experimental ones.

|       | GIPAW                          | VASP                           | EXP                                | GIPAW                          | VASP                           | EXP                                |
|-------|--------------------------------|--------------------------------|------------------------------------|--------------------------------|--------------------------------|------------------------------------|
|       | AgN <sub>3</sub>               | AgN <sub>3</sub>               | AgN <sub>3</sub> [1]               | Au <sub>2</sub> O <sub>3</sub> | Au <sub>2</sub> O <sub>3</sub> | Au <sub>2</sub> O <sub>3</sub> [2] |
| a, Å  | 5.82                           | 5.83                           | 5.52                               | 4.44                           | 4.06                           | 3.84                               |
| b, Å  | 5.82                           | 5.83                           | 5.52                               | 10.51                          | 10.66                          | 10.52                              |
| c, Å  | 5.98                           | 6.03                           | 5.57                               | 12.95                          | 13.05                          | 12.82                              |
| alpha | 90.00                          | 90.00                          | 90.00                              | 90.00                          | 90.00                          | 90.00                              |
| beta  | 90.00                          | 90.00                          | 90.00                              | 90.00                          | 90.00                          | 90.00                              |
| gamma | 90.00                          | 90.00                          | 90.00                              | 90.00                          | 90.00                          | 90.00                              |
|       | CdO <sub>2</sub>               | CdO <sub>2</sub>               | CdO <sub>2</sub> [3]               | Cr <sub>2</sub> O <sub>3</sub> | Cr <sub>2</sub> O <sub>3</sub> | Cr <sub>2</sub> O <sub>3</sub> [4] |
| a, Å  | 5.44                           | 5.40                           | 5.31                               | 4.69                           | 5.07                           | 4.96                               |
| b, Å  | 5.44                           | 5.40                           | 5.31                               | 4.69                           | 5.07                           | 4.96                               |
| c, Å  | 5.44                           | 5.40                           | 5.31                               | 13.98                          | 13.87                          | 13.59                              |
| alpha | 90.00                          | 90.00                          | 90.00                              | 90.00                          | 90.00                          | 90.00                              |
| beta  | 90.00                          | 90.00                          | 90.00                              | 90.00                          | 90.00                          | 90.00                              |
| gamma | 90.00                          | 90.00                          | 90.00                              | 120.00                         | 120.00                         | 120.00                             |
|       | HgO                            | HgO                            | HgO [5]                            | IrN <sub>2</sub>               | IrN <sub>2</sub>               | IrN <sub>2</sub> [6]               |
| a, Å  | 4.11                           | 3.74                           | 3.52                               | 4.87                           | 4.88                           | 4.81                               |
| b, Å  | 6.40                           | 5.80                           | 5.52                               | 4.91                           | 4.93                           | 4.86                               |
| c, Å  | 6.94                           | 6.74                           | 6.61                               | 4.90                           | 4.92                           | 4.85                               |
| alpha | 90.00                          | 90.00                          | 90.00                              | 90.00                          | 90.00                          | 90.00                              |
| beta  | 90.00                          | 90.00                          | 90.00                              | 108.05                         | 107.94                         | 108.25                             |
| gamma | 90.00                          | 90.00                          | 90.00                              | 90.00                          | 90.00                          | 90.00                              |
|       | Lu <sub>2</sub> O <sub>3</sub> | Lu <sub>2</sub> O <sub>3</sub> | Lu <sub>2</sub> O <sub>3</sub> [7] | MoO <sub>3</sub>               | MoO <sub>3</sub>               | MoO <sub>3</sub> [8]               |
| a, Å  | 10.27                          | 10.36                          | 10.44                              | 7.40                           | 7.44                           | 7.48                               |
| b, Å  | 10.27                          | 10.36                          | 10.44                              | 7.85                           | 7.80                           | 7.69                               |
| c, Å  | 10.27                          | 10.36                          | 10.44                              | 10.97                          | 10.91                          | 10.68                              |
| alpha | 90.00                          | 90.00                          | 90.00                              | 90.00                          | 90.00                          | 90.00                              |
| beta  | 90.00                          | 90.00                          | 90.00                              | 132.43                         | 132.75                         | 135.96                             |
| gamma | 90.00                          | 90.00                          | 90.00                              | 90.00                          | 90.00                          | 90.00                              |
|       | Nb <sub>2</sub> O <sub>5</sub> | Nb <sub>2</sub> O <sub>5</sub> | Nb <sub>2</sub> O <sub>5</sub> [9] | OsO <sub>4</sub>               | OsO <sub>4</sub>               | OsO <sub>4</sub> [10]              |
| a, Å  | 19.62                          | 19.79                          | 19.35                              | 9.98                           | 9.79                           | 9.38                               |
| b, Å  | 3.84                           | 3.87                           | 3.82                               | 4.82                           | 4.75                           | 4.52                               |
| c, Å  | 20.64                          | 20.81                          | 21.16                              | 9.13                           | 8.96                           | 8.63                               |
| alpha | 90.00                          | 90.00                          | 90.00                              | 90.00                          | 90.00                          | 90.00                              |
| beta  | 115.70                         | 115.71                         | 119.83                             | 116.07                         | 115.97                         | 116.60                             |
| gamma | 90.00                          | 90.00                          | 90.00                              | 90.00                          | 90.00                          | 90.00                              |

**Table S2.** Table of lattice parameters of 11 fully-relaxed unit cells with developed *GIPAW* pseudopotentials and those optimized with PAW pseudopotentials in VASP code and the experimental ones.

|       | GIPAW                          | VASP                           | EXP                                 | GIPAW                          | VASP                           | EXP                                 |
|-------|--------------------------------|--------------------------------|-------------------------------------|--------------------------------|--------------------------------|-------------------------------------|
|       | PdN <sub>2</sub>               | PdN <sub>2</sub>               | PdN <sub>2</sub>                    | PtO <sub>2</sub>               | PtO <sub>2</sub>               | PtO <sub>2</sub> [11]               |
| a, Å  | 5.06                           | 5.14                           | -                                   | 3.16                           | 3.16                           | 3.10                                |
| b, Å  | 5.06                           | 5.14                           | -                                   | 3.16                           | 3.16                           | 3.10                                |
| c, Å  | 5.06                           | 5.14                           | -                                   | 10.67                          | 9.44                           | 8.32                                |
| alpha | 90.00                          | 90.00                          | -                                   | 90.00                          | 90.00                          | 90.00                               |
| beta  | 90.00                          | 90.00                          | -                                   | 90.00                          | 90.00                          | 90.00                               |
| gamma | 90.00                          | 90.00                          | -                                   | 120.00                         | 120.00                         | 120.00                              |
|       | Re <sub>2</sub> O <sub>7</sub> | Re <sub>2</sub> O <sub>7</sub> | Re <sub>2</sub> O <sub>7</sub> [12] | Rh <sub>2</sub> O <sub>3</sub> | Rh <sub>2</sub> O <sub>3</sub> | Rh <sub>2</sub> O <sub>3</sub> [13] |
| a, Å  | 5.53                           | 5.56                           | 5.44                                | 5.18                           | 5.21                           | 5.06                                |
| b, Å  | 12.93                          | 12.74                          | 12.51                               | 5.18                           | 5.21                           | 5.06                                |
| c, Å  | 16.26                          | 15.57                          | 15.20                               | 14.03                          | 14.09                          | 13.66                               |
| alpha | 90.00                          | 90.00                          | 90.00                               | 90.00                          | 90.00                          | 90.00                               |
| beta  | 90.00                          | 90.00                          | 90.00                               | 90.00                          | 90.00                          | 90.00                               |
| gamma | 90.00                          | 90.00                          | 90.00                               | 120.00                         | 120.00                         | 120.00                              |
|       | RuO <sub>4</sub>               | RuO <sub>4</sub>               | RuO <sub>4</sub> [14]               | Sc <sub>2</sub> O <sub>3</sub> | Sc <sub>2</sub> O <sub>3</sub> | Sc <sub>2</sub> O <sub>3</sub> [15] |
| a, Å  | 9.09                           | 9.09                           | 8.51                                | 9.89                           | 9.92                           | 9.84                                |
| b, Å  | 9.09                           | 9.09                           | 8.51                                | 9.89                           | 9.92                           | 9.84                                |
| c, Å  | 9.09                           | 9.09                           | 8.51                                | 9.89                           | 9.92                           | 9.84                                |
| alpha | 90.00                          | 90.00                          | 90.00                               | 90.00                          | 90.00                          | 90.00                               |
| beta  | 90.00                          | 90.00                          | 90.00                               | 90.00                          | 90.00                          | 90.00                               |
| gamma | 90.00                          | 90.00                          | 90.00                               | 90.00                          | 90.00                          | 90.00                               |
|       | Ta <sub>2</sub> O <sub>5</sub> | Ta <sub>2</sub> O <sub>5</sub> | Ta <sub>2</sub> O <sub>5</sub> [16] | Tc <sub>2</sub> O <sub>7</sub> | Tc <sub>2</sub> O <sub>7</sub> | Tc <sub>2</sub> O <sub>7</sub> [17] |
| a, Å  | 12.82                          | 12.95                          | 12.79                               | 5.95                           | 5.89                           | 5.62                                |
| b, Å  | 4.88                           | 4.93                           | 4.85                                | 7.88                           | 7.82                           | 7.44                                |
| c, Å  | 5.53                           | 5.60                           | 5.53                                | 14.17                          | 14.27                          | 13.76                               |
| alpha | 90.00                          | 90.00                          | 90.00                               | 90.00                          | 90.00                          | 90.00                               |
| beta  | 103.12                         | 103.17                         | 104.26                              | 90.00                          | 90.00                          | 90.00                               |
| gamma | 90.00                          | 90.00                          | 90.00                               | 90.00                          | 90.00                          | 90.00                               |
|       | V <sub>2</sub> O <sub>5</sub>  | V <sub>2</sub> O <sub>5</sub>  | V <sub>2</sub> O <sub>5</sub> [18]  | WO <sub>3</sub>                | WO <sub>3</sub>                | WO <sub>3</sub> [19]                |
| a, Å  | 3.57                           | 3.62                           | 3.57                                | 5.30                           | 5.41                           | 5.29                                |
| b, Å  | 4.79                           | 4.80                           | 4.38                                | 5.30                           | 5.41                           | 5.29                                |
| c, Å  | 11.53                          | 11.55                          | 11.54                               | 7.88                           | 7.82                           | 7.86                                |
| alpha | 90.00                          | 90.00                          | 90.00                               | 90.00                          | 90.00                          | 90.00                               |
| beta  | 90.00                          | 90.00                          | 90.00                               | 90.00                          | 90.00                          | 90.00                               |
| gamma | 90.00                          | 90.00                          | 90.00                               | 90.00                          | 90.00                          | 90.00                               |
|       | Y <sub>2</sub> O <sub>3</sub>  | Y <sub>2</sub> O <sub>3</sub>  | Y <sub>2</sub> O <sub>3</sub> [20]  |                                |                                |                                     |
| a, Å  | 10.67                          | 10.71                          | 10.60                               |                                |                                |                                     |
| b, Å  | 10.67                          | 10.71                          | 10.60                               |                                |                                |                                     |
| c, Å  | 10.67                          | 10.71                          | 10.60                               |                                |                                |                                     |
| alpha | 90.00                          | 90.00                          | 90.00                               |                                |                                |                                     |
| beta  | 90.00                          | 90.00                          | 90.00                               |                                |                                |                                     |
| gamma | 90.00                          | 90.00                          | 90.00                               |                                |                                |                                     |

**Table S3.** Atomic crystallographic positions with vectors lattice in Angstrom of AgN<sub>3</sub> with total chemical shift  $\sigma$  in ppm and quadrupolar coupling constant  $C_Q$  in MHz for each element.

| Atom  | x            | y            | z             | $\sigma$ | $C_Q$  |
|-------|--------------|--------------|---------------|----------|--------|
| Ag    | 0.0000000000 | 0.0000000000 | 0.2488353368  | 2542.54  | 0.0395 |
| Ag    | 0.0000000000 | 0.0000000000 | 0.7511646632  | 2542.54  | 0.0395 |
| Ag    | 0.5000000000 | 0.5000000000 | 0.7511646632  | 2542.54  | 0.0395 |
| Ag    | 0.5000000000 | 0.5000000000 | 0.2488353368  | 2542.54  | 0.0395 |
| N     | 0.1452725771 | 0.6452725770 | 0.0000000000  | 109.36   | 0.9795 |
| N     | 0.3547210402 | 0.8547210403 | 0.5000000000  | 108.43   | 0.9782 |
| N     | 0.3547274230 | 0.1452725771 | -0.0000000000 | 109.36   | 0.9795 |
| N     | 0.5000000000 | 0.0000000000 | 0.0000000000  | -56.21   | 0.2834 |
| N     | 0.1452789597 | 0.3547210402 | 0.5000000000  | 108.43   | 0.9782 |
| N     | 0.0000000000 | 0.5000000000 | 0.0000000000  | -56.21   | 0.2834 |
| N     | 0.6452789598 | 0.1452789597 | 0.5000000000  | 108.43   | 0.9782 |
| N     | 0.8547274229 | 0.3547274230 | 0.0000000000  | 109.36   | 0.9795 |
| N     | 0.8547210403 | 0.6452789598 | 0.5000000000  | 108.43   | 0.9782 |
| N     | 0.0000000000 | 0.5000000000 | 0.5000000000  | -55.81   | 0.2815 |
| N     | 0.6452725770 | 0.8547274229 | -0.0000000000 | 109.36   | 0.9795 |
| N     | 0.5000000000 | 0.0000000000 | 0.5000000000  | -55.81   | 0.2815 |
| $V_x$ | 5.816435545  | 0.0000000000 | 0.0000000000  |          |        |
| $V_y$ | 0.0000000000 | 5.816435545  | 0.0000000000  |          |        |
| $V_z$ | 0.0000000000 | 0.0000000000 | 5.979657770   |          |        |

**Table S4.** Atomic crystallographic positions with vectors lattice in Angstrom of Au<sub>2</sub>O<sub>3</sub> with total chemical shift  $\sigma$  in ppm and quadrupolar coupling constant  $C_Q$  in MHz for each element.

| Atom           | x            | y             | z             | $\sigma$ | $C_Q$   |
|----------------|--------------|---------------|---------------|----------|---------|
| Au             | 0.7506047966 | 0.3639592033  | 0.4548401914  | 1109.38  | 2.3886  |
| Au             | 0.7505997118 | 0.1358594099  | 0.0452190196  | 1112.50  | 2.4023  |
| Au             | 0.0083330326 | 0.3856771012  | 0.2052914724  | 1118.74  | 2.5019  |
| Au             | 0.0084728125 | 0.1143106004  | 0.2947498295  | 1119.94  | 2.5048  |
| Au             | 0.2506047974 | 0.3639592168  | 0.9548401909  | 1109.38  | 2.3886  |
| Au             | 0.2505997023 | 0.1358593889  | 0.5452189953  | 1112.49  | 2.4023  |
| Au             | 0.5083330175 | 0.3856771043  | 0.7052914487  | 1118.74  | 2.5019  |
| Au             | 0.5084728323 | 0.1143106106  | 0.7947497872  | 1119.94  | 2.5048  |
| Au             | 0.2505997023 | 0.8641405961  | 0.4547810047  | 1112.49  | 2.4023  |
| Au             | 0.2506047974 | 0.6360408132  | 0.0451598241  | 1109.38  | 2.3886  |
| Au             | 0.5084728323 | 0.8856894114  | 0.2052501978  | 1119.94  | 2.5048  |
| Au             | 0.5083330175 | 0.6143228657  | 0.2947085513  | 1118.74  | 2.5019  |
| Au             | 0.7505997118 | 0.8641405751  | 0.9547809954  | 1112.50  | 2.4023  |
| Au             | 0.7506047966 | 0.6360408267  | 0.5451598086  | 1109.38  | 2.3886  |
| Au             | 0.0084728125 | 0.8856894216  | 0.7052501705  | 1119.94  | 2.5048  |
| Au             | 0.0083330326 | 0.6143228688  | 0.7947085126  | 1118.74  | 2.5019  |
| O              | 0.4706604234 | 0.0000000000  | 0.0000000000  | -100.02  | -4.0990 |
| O              | 0.7283148985 | 0.2499869834  | 0.2500680570  | -98.14   | -4.0639 |
| O              | 0.1030601472 | 0.2658118017  | 0.0811322463  | 69.58    | -3.0230 |
| O              | 0.1034581114 | 0.2341174665  | 0.4189458373  | 68.92    | -3.0147 |
| O              | 0.8561661232 | 0.0160576796  | 0.1679963254  | 68.34    | -3.0080 |
| O              | 0.8560366172 | 0.4838805796  | 0.3320462074  | 67.17    | -3.0103 |
| O              | 0.9706603268 | -0.0000000000 | 0.5000000000  | -100.02  | -4.0990 |
| O              | 0.2283149049 | 0.2499869964  | 0.7500680402  | -98.14   | -4.0639 |
| O              | 0.6030601259 | 0.2658117746  | 0.5811322344  | 69.58    | -3.0230 |
| O              | 0.6034581107 | 0.2341174633  | 0.9189458222  | 68.92    | -3.0147 |
| O              | 0.3561661231 | 0.0160576744  | 0.6679962806  | 68.34    | -3.0080 |
| O              | 0.3560366032 | 0.4838805868  | 0.8320461786  | 67.17    | -3.0103 |
| O              | 0.9708473402 | 0.5000000000  | -0.0000000000 | -102.17  | -4.0982 |
| O              | 0.2283149049 | 0.7500130036  | 0.2499319598  | -98.14   | -4.0639 |
| O              | 0.6034581107 | 0.7658825367  | 0.0810541698  | 68.92    | -3.0147 |
| O              | 0.6030601259 | 0.7341882254  | 0.4188677656  | 69.58    | -3.0230 |
| O              | 0.3560366032 | 0.5161194132  | 0.1679538364  | 67.17    | -3.0103 |
| O              | 0.3561661231 | 0.9839423316  | 0.3320037194  | 68.34    | -3.0080 |
| O              | 0.4708473566 | 0.5000000000  | 0.5000000000  | -102.17  | -4.0982 |
| O              | 0.7283148985 | 0.7500130166  | 0.7499319430  | -98.14   | -4.0639 |
| O              | 0.1034581114 | 0.7658825335  | 0.5810541627  | 68.92    | -3.0147 |
| O              | 0.1030601472 | 0.7341881983  | 0.9188677457  | 69.58    | -3.0230 |
| O              | 0.8560366172 | 0.5161194204  | 0.6679537926  | 67.17    | -3.0103 |
| O              | 0.8561661232 | 0.9839423264  | 0.8320036896  | 68.34    | -3.0080 |
| V <sub>x</sub> | 4.444555579  | 0.0000000000  | 0.0000000000  |          |         |
| V <sub>y</sub> | 0.0000000000 | 10.511051219  | -0.015553227  |          |         |
| V <sub>z</sub> | 0.0000000000 | -0.019107155  | 12.946575452  |          |         |

**Table S5.** Atomic crystallographic positions with vectors lattice in Angstrom of CdO<sub>2</sub> with total chemical shift  $\sigma$  in ppm and quadrupolar coupling constant  $C_Q$  in MHz for each element.

| Atom  | x             | y             | z            | $\sigma$ | $C_Q$  |
|-------|---------------|---------------|--------------|----------|--------|
| Cd    | 0.5000000000  | -0.0000000000 | 0.0000000000 | 3322.38  | 0.0859 |
| Cd    | 0.0000000000  | 0.0000000000  | 0.5000000000 | 3322.38  | 0.0859 |
| Cd    | -0.0000000000 | 0.5000000000  | 0.0000000000 | 3322.38  | 0.0859 |
| Cd    | 0.5000000000  | 0.5000000000  | 0.5000000000 | 3322.38  | 0.0859 |
| O     | 0.0812794084  | 0.4187205996  | 0.5812794004 | -8.02    | 7.0380 |
| O     | 0.4187205996  | 0.5812794004  | 0.0812794084 | -8.02    | 7.0380 |
| O     | 0.5812794004  | 0.0812794084  | 0.4187205996 | -8.02    | 7.0380 |
| O     | 0.9187205996  | 0.9187205996  | 0.9187205996 | -8.02    | 7.0380 |
| O     | 0.0812794084  | 0.0812794084  | 0.0812794084 | -8.02    | 7.0380 |
| O     | 0.4187205996  | 0.9187205996  | 0.5812794004 | -8.02    | 7.0380 |
| O     | 0.5812794004  | 0.4187205996  | 0.9187205996 | -8.02    | 7.0380 |
| O     | 0.9187205996  | 0.5812794004  | 0.4187205996 | -8.02    | 7.0380 |
| $V_x$ | 5.436482245   | 0.0000000000  | 0.0000000000 |          |        |
| $V_y$ | 0.0000000000  | 5.436482245   | 0.0000000000 |          |        |
| $V_z$ | 0.0000000000  | 0.0000000000  | 5.436482245  |          |        |

**Table S6.** Atomic crystallographic positions with vectors lattice in Angstrom of Cr<sub>2</sub>O<sub>3</sub> with total chemical shift  $\sigma$  in ppm and quadrupolar coupling constant  $C_Q$  in MHz for each element.

| Atom           | x             | y             | z             | $\sigma$ | $C_Q$   |
|----------------|---------------|---------------|---------------|----------|---------|
| Cr             | 0.3333333430  | 0.6666666870  | 0.0070312626  | -6931.01 | -0.0681 |
| Cr             | 0.6666666870  | 0.3333333430  | 0.1737402415  | -6933.62 | -0.0682 |
| Cr             | -0.0000000000 | -0.0000000000 | 0.1595430229  | -6935.10 | -0.0669 |
| Cr             | 0.3333333430  | 0.6666666870  | 0.3262597532  | -6934.01 | -0.0682 |
| Cr             | -0.0000000000 | -0.0000000000 | 0.3404569819  | -6935.34 | -0.0669 |
| Cr             | 0.3333333430  | 0.6666666870  | 0.5070312699  | -6930.76 | -0.0681 |
| Cr             | 0.6666666870  | 0.3333333430  | 0.4929687301  | -6930.76 | -0.0681 |
| Cr             | 0.0000000000  | 0.0000000000  | 0.6595430181  | -6935.34 | -0.0669 |
| Cr             | 0.6666666870  | 0.3333333430  | 0.6737402168  | -6934.01 | -0.0682 |
| Cr             | 0.0000000000  | 0.0000000000  | 0.8404569621  | -6935.10 | -0.0669 |
| Cr             | 0.3333333430  | 0.6666666870  | 0.8262597885  | -6933.62 | -0.0682 |
| Cr             | 0.6666666870  | 0.3333333430  | 0.9929687324  | -6931.01 | -0.0681 |
| O              | 0.3297635629  | -0.0000000060 | 0.2500000059  | -221.84  | -1.0303 |
| O              | 0.0000000060  | 0.3297635689  | 0.2500000059  | -221.84  | -1.0303 |
| O              | 0.6702364011  | 0.6702364071  | 0.2500000059  | -221.84  | -1.0303 |
| O              | 0.3367974660  | 0.3333495769  | 0.0833214601  | -222.08  | -1.0298 |
| O              | 0.6666504531  | 0.0034478980  | 0.0833214601  | -222.08  | -1.0298 |
| O              | 0.9965520810  | 0.6632025340  | 0.0833214601  | -222.08  | -1.0298 |
| O              | 0.9965520999  | 0.3333495869  | 0.5833214282  | -222.08  | -1.0298 |
| O              | 0.6666504431  | 0.6632025430  | 0.5833214282  | -222.08  | -1.0298 |
| O              | 0.3367974570  | 0.0034478791  | 0.5833214282  | -222.08  | -1.0298 |
| O              | 0.0034478791  | 0.6666504431  | 0.4166785418  | -222.08  | -1.0298 |
| O              | 0.3333495869  | 0.3367974570  | 0.4166785418  | -222.08  | -1.0298 |
| O              | 0.6632025430  | 0.9965520999  | 0.4166785418  | -222.08  | -1.0298 |
| O              | 0.6632025340  | 0.6666504531  | 0.9166785549  | -222.08  | -1.0298 |
| O              | 0.3333495769  | 0.9965520810  | 0.9166785549  | -222.08  | -1.0298 |
| O              | 0.0034478980  | 0.3367974660  | 0.9166785549  | -222.08  | -1.0298 |
| O              | 0.6702364071  | 0.0000000060  | 0.7499999941  | -221.84  | -1.0303 |
| O              | -0.0000000060 | 0.6702364011  | 0.7499999941  | -221.84  | -1.0303 |
| O              | 0.3297635689  | 0.3297635629  | 0.7499999941  | -221.84  | -1.0303 |
| V <sub>x</sub> | 4.690086188   | -0.0000000000 | 0.0000000000  |          |         |
| V <sub>y</sub> | -2.345043094  | 4.061733785   | -0.0000000000 |          |         |
| V <sub>z</sub> | 0.0000000000  | 0.0000000000  | 13.981492506  |          |         |

**Table S7.** Atomic crystallographic positions with vectors lattice in Angstrom of HgO with total chemical shift  $\sigma$  in ppm and quadrupolar coupling constant  $C_Q$  in MHz for each element.

| Atom           | x            | y            | z            | $\sigma$ | $C_Q$    |
|----------------|--------------|--------------|--------------|----------|----------|
| Hg             | 0.7415028137 | 0.7500000000 | 0.3795168369 | 6700.46  | -15.0543 |
| Hg             | 0.2415027987 | 0.2500000000 | 0.1204831781 | 6700.46  | -15.0543 |
| Hg             | 0.2584971863 | 0.2500000000 | 0.6204831931 | 6700.46  | -15.0543 |
| Hg             | 0.7584971863 | 0.7500000000 | 0.8795168069 | 6700.46  | -15.0543 |
| O              | 0.0019791187 | 0.7500000000 | 0.1324661481 | -75.43   | -3.2431  |
| O              | 0.5019791257 | 0.2500000000 | 0.3675338669 | -75.43   | -3.2431  |
| O              | 0.9980208743 | 0.2500000000 | 0.8675338369 | -75.43   | -3.2431  |
| O              | 0.4980208743 | 0.7500000000 | 0.6324661631 | -75.43   | -3.2431  |
| V <sub>x</sub> | 4.111798301  | 0.0000000000 | 0.0000000000 |          |          |
| V <sub>y</sub> | 0.0000000000 | 6.401409578  | 0.0000000000 |          |          |
| V <sub>z</sub> | 0.0000000000 | 0.0000000000 | 6.943959451  |          |          |

**Table S8.** Atomic crystallographic positions with vectors lattice in Angstrom of IrN<sub>2</sub> with total chemical shift  $\sigma$  in ppm and quadrupolar coupling constant  $C_Q$  in MHz for each element.

| Atom  | x            | y             | z            | $\sigma$ | $C_Q$   |
|-------|--------------|---------------|--------------|----------|---------|
| Ir    | 0.7657112105 | 0.4999716617  | 0.2779448536 | -4132.37 | -4.9472 |
| Ir    | 0.2342887605 | -0.0000283673 | 0.2220551464 | -4132.37 | -4.9472 |
| Ir    | 0.2342887605 | 0.5000283683  | 0.7220551464 | -4132.37 | -4.9472 |
| Ir    | 0.7657112105 | 1.0000283383  | 0.7779448536 | -4132.37 | -4.9472 |
| N     | 0.6737671571 | 0.0886374877  | 0.3413797969 | -59.32   | 1.8633  |
| N     | 0.3262328429 | 0.5886375027  | 0.1586202031 | -59.32   | 1.8633  |
| N     | 0.3262328429 | 0.9113624973  | 0.6586202331 | -59.32   | 1.8633  |
| N     | 0.6737671571 | 0.4113624973  | 0.8413797669 | -59.32   | 1.8633  |
| N     | 0.8159056364 | 0.5994971946  | 0.6974220543 | -131.16  | 1.4674  |
| N     | 0.1840943336 | 0.0994972176  | 0.8025779457 | -131.16  | 1.4674  |
| N     | 0.1840943336 | 0.4005027754  | 0.3025779747 | -131.16  | 1.4674  |
| N     | 0.8159056364 | 0.9005028054  | 0.1974220393 | -131.16  | 1.4674  |
| $V_x$ | 4.868755833  | 0.000000000   | -0.004531696 |          |         |
| $V_y$ | 0.000000000  | 4.909749507   | 0.000000000  |          |         |
| $V_z$ | -1.515686762 | 0.000000000   | 4.664866477  |          |         |



**Table S9.** Atomic crystallographic positions with vectors lattice in Angstrom of Lu<sub>2</sub>O<sub>3</sub> with total chemical shift  $\sigma$  in ppm and quadrupolar coupling constant  $C_Q$  in MHz for each element.

| Atom           | x             | y             | z             | $\sigma$ | $C_Q$   |
|----------------|---------------|---------------|---------------|----------|---------|
| Lu             | 0.0000068562  | 0.2500045430  | 0.4665328547  | 5292.67  | -3.5672 |
| Lu             | 0.0334794625  | 0.0000012289  | 0.7499904193  | 5292.72  | -3.5659 |
| Lu             | 0.7499904193  | 0.0334794625  | 0.0000012289  | 5292.72  | -3.5659 |
| Lu             | 0.4665328547  | 0.0000068562  | 0.2500045430  | 5292.67  | -3.5672 |
| Lu             | 0.2500045430  | 0.4665328547  | 0.0000068562  | 5292.67  | -3.5672 |
| Lu             | 0.0000012289  | 0.7499904193  | 0.0334794625  | 5292.72  | -3.5659 |
| Lu             | 0.4999893974  | 0.2499926171  | 0.0334763343  | 5292.74  | -3.5608 |
| Lu             | 0.4665269367  | 0.5000011432  | 0.7500048954  | 5292.92  | -3.5711 |
| Lu             | 0.7500048954  | 0.4665269367  | 0.5000011432  | 5292.92  | -3.5711 |
| Lu             | 0.0334763343  | 0.4999893974  | 0.2499926171  | 5292.74  | -3.5608 |
| Lu             | 0.2499926171  | 0.0334763343  | 0.4999893974  | 5292.74  | -3.5608 |
| Lu             | 0.5000011432  | 0.7500048954  | 0.4665269367  | 5292.92  | -3.5711 |
| Lu             | 0.7500049373  | 0.2500002751  | 0.2500047689  | 5390.71  | 6.5951  |
| Lu             | 0.2500002751  | 0.2500047689  | 0.7500049373  | 5390.71  | 6.5951  |
| Lu             | 0.2500047689  | 0.7500049373  | 0.2500002751  | 5390.71  | 6.5951  |
| Lu             | 0.2499899590  | 0.2499899590  | 0.2499899590  | 5390.48  | 6.5929  |
| Lu             | 0.5000106026  | 0.7500073829  | 0.9665236767  | 5292.74  | -3.5608 |
| Lu             | 0.5334730633  | 0.4999988568  | 0.2499951046  | 5292.92  | -3.5711 |
| Lu             | 0.2499951046  | 0.5334730633  | 0.4999988568  | 5292.92  | -3.5711 |
| Lu             | 0.9665236767  | 0.5000106026  | 0.7500073829  | 5292.74  | -3.5608 |
| Lu             | 0.7500073829  | 0.9665236767  | 0.5000106026  | 5292.74  | -3.5608 |
| Lu             | 0.4999988568  | 0.2499951046  | 0.5334730633  | 5292.92  | -3.5711 |
| Lu             | -0.0000068562 | 0.7499954570  | 0.5334671453  | 5292.67  | -3.5672 |
| Lu             | 0.9665205485  | -0.0000012289 | 0.2500095807  | 5292.72  | -3.5659 |
| Lu             | 0.2500095807  | 0.9665205485  | -0.0000012289 | 5292.72  | -3.5659 |
| Lu             | 0.5334671453  | -0.0000068562 | 0.7499954570  | 5292.67  | -3.5672 |
| Lu             | 0.7499954570  | 0.5334671453  | -0.0000068562 | 5292.67  | -3.5672 |
| Lu             | -0.0000012289 | 0.2500095807  | 0.9665205485  | 5292.72  | -3.5659 |
| Lu             | 0.2499950627  | 0.7499997249  | 0.7499952311  | 5390.71  | 6.5951  |
| Lu             | 0.7499997249  | 0.7499952311  | 0.2499950627  | 5390.71  | 6.5951  |
| Lu             | 0.7499952311  | 0.2499950627  | 0.7499997249  | 5390.71  | 6.5951  |
| Lu             | 0.7500100410  | 0.7500100410  | 0.7500100410  | 5390.48  | 6.5929  |
| O              | 0.1524164061  | 0.8801759756  | 0.6087783966  | -95.19   | 0.3665  |
| O              | 0.3475717339  | 0.8802078208  | 0.3911233667  | -95.23   | 0.3667  |
| O              | 0.1524499425  | 0.1198078475  | 0.8911520256  | -95.20   | 0.3664  |
| O              | 0.1197970167  | 0.1088216041  | 0.3475725878  | -95.21   | 0.3662  |
| O              | 0.1088216041  | 0.3475725878  | 0.1197970167  | -95.21   | 0.3662  |
| O              | 0.6087783966  | 0.1524164061  | 0.8801759756  | -95.19   | 0.3665  |
| O              | 0.8802078208  | 0.3911233667  | 0.3475717339  | -95.23   | 0.3667  |
| O              | 0.8911520256  | 0.1524499425  | 0.1198078475  | -95.20   | 0.3664  |
| O              | 0.8801759756  | 0.6087783966  | 0.1524164061  | -95.19   | 0.3665  |
| O              | 0.3911233667  | 0.3475717339  | 0.8802078208  | -95.23   | 0.3667  |
| O              | 0.1198078475  | 0.8911520256  | 0.1524499425  | -95.20   | 0.3664  |
| O              | 0.3475725878  | 0.1197970167  | 0.1088216041  | -95.21   | 0.3662  |
| O              | 0.3475792385  | 0.6198224817  | 0.8911711367  | -95.22   | 0.3666  |
| O              | 0.1524570208  | 0.6198266793  | 0.1088292169  | -95.21   | 0.3671  |
| O              | 0.3475737889  | 0.3801900653  | 0.6088777457  | -95.22   | 0.3668  |
| O              | 0.3801866808  | 0.3911185475  | 0.1524681436  | -95.20   | 0.3673  |
| O              | 0.1524681436  | 0.3801866808  | 0.3911185475  | -95.20   | 0.3673  |
| O              | 0.3801900653  | 0.6088777457  | 0.3475737889  | -95.22   | 0.3668  |
| O              | 0.1088292169  | 0.1524570208  | 0.6198266793  | -95.21   | 0.3671  |
| O              | 0.6198224817  | 0.8911711367  | 0.3475792385  | -95.22   | 0.3666  |
| O              | 0.6088777457  | 0.3475737889  | 0.3801900653  | -95.22   | 0.3668  |
| O              | 0.6198266793  | 0.1088292169  | 0.1524570208  | -95.21   | 0.3671  |
| O              | 0.8911711367  | 0.3475792385  | 0.6198224817  | -95.22   | 0.3666  |
| O              | 0.3911185475  | 0.1524681436  | 0.3801866808  | -95.20   | 0.3673  |
| O              | 0.6524207915  | 0.3801775183  | 0.1088288783  | -95.22   | 0.3666  |
| O              | 0.8475429492  | 0.3801733207  | 0.8911707981  | -95.21   | 0.3671  |
| O              | 0.6524262411  | 0.6198099347  | 0.3911222243  | -95.22   | 0.3668  |
| O              | 0.6198133192  | 0.6088814225  | 0.8475318264  | -95.20   | 0.3673  |
| O              | 0.6088814225  | 0.8475318264  | 0.6198133192  | -95.20   | 0.3673  |
| O              | 0.1088288783  | 0.6524207915  | 0.3801775183  | -95.22   | 0.3666  |
| O              | 0.3801733207  | 0.8911707981  | 0.8475429492  | -95.21   | 0.3671  |
| O              | 0.3911222243  | 0.6524262411  | 0.6198099347  | -95.22   | 0.3668  |
| O              | 0.3801775183  | 0.1088288783  | 0.6524207915  | -95.22   | 0.3666  |
| O              | 0.8911707981  | 0.8475429492  | 0.3801733207  | -95.21   | 0.3671  |
| O              | 0.6198099347  | 0.3911222243  | 0.6524262411  | -95.22   | 0.3668  |
| O              | 0.8475318264  | 0.6198133192  | 0.6088814225  | -95.20   | 0.3673  |
| O              | 0.8475835639  | 0.1198240244  | 0.3912215734  | -95.19   | 0.3665  |
| O              | 0.6524282961  | 0.1197921792  | 0.6088766033  | -95.23   | 0.3667  |
| O              | 0.8475500275  | 0.8801921525  | 0.1088479894  | -95.20   | 0.3664  |
| O              | 0.8802029833  | 0.8911784109  | 0.6524274422  | -95.21   | 0.3662  |
| O              | 0.6524274422  | 0.8802029833  | 0.8911784109  | -95.21   | 0.3662  |
| O              | 0.8801921525  | 0.1088479894  | 0.8475500275  | -95.20   | 0.3664  |
| O              | 0.6088766033  | 0.6524282961  | 0.1197921792  | -95.23   | 0.3667  |
| O              | 0.1198240244  | 0.3912215734  | 0.8475835639  | -95.19   | 0.3665  |
| O              | 0.1088479894  | 0.8475500275  | 0.8801921525  | -95.20   | 0.3664  |
| O              | 0.1197921792  | 0.6088766033  | 0.6524282961  | -95.23   | 0.3667  |
| O              | 0.3912215734  | 0.8475835639  | 0.1198240244  | -95.19   | 0.3665  |
| O              | 0.8911784109  | 0.6524274422  | 0.8802029833  | -95.21   | 0.3662  |
| V <sub>x</sub> | 10.268670937  | 0.000081670   | 0.000081670   |          |         |
| V <sub>y</sub> | 0.000081670   | 10.268670937  | 0.000081670   |          |         |
| V <sub>z</sub> | 0.000081670   | 0.000081670   | 10.268670937  |          |         |

**Table S10.** Atomic crystallographic positions with vectors lattice in Angstrom of MoO<sub>3</sub> with total chemical shift  $\sigma$  in ppm and quadrupolar coupling constant  $C_Q$  in MHz for each element.

| Atom           | x             | y            | z            | $\sigma$ | $C_Q$   |
|----------------|---------------|--------------|--------------|----------|---------|
| Mo             | 0.4631898717  | 0.5398726930 | 0.7129519266 | -1196.63 | -2.3031 |
| Mo             | 0.5368101283  | 0.0398727230 | 0.7870480734 | -1196.63 | -2.3031 |
| Mo             | 0.5368101283  | 0.4601272770 | 0.2870481024 | -1196.63 | -2.3031 |
| Mo             | 0.4631898717  | 0.9601273070 | 0.2129519116 | -1196.63 | -2.3031 |
| Mo             | 0.9627496005  | 0.5398687320 | 0.2129632747 | -1196.63 | -2.3039 |
| Mo             | 0.0372504185  | 0.0398687620 | 0.2870367253 | -1196.63 | -2.3039 |
| Mo             | 0.0372504185  | 0.4601312380 | 0.7870367253 | -1196.63 | -2.3039 |
| Mo             | 0.9627496005  | 0.9601312680 | 0.7129632747 | -1196.63 | -2.3039 |
| O              | 0.2559760885  | 0.0209516778 | 0.5007572275 | -532.69  | -0.2700 |
| O              | 0.7440239115  | 0.5209516668 | 0.9992427725 | -532.69  | -0.2700 |
| O              | 0.7440239115  | 0.9790483332 | 0.4992427725 | -532.69  | -0.2700 |
| O              | 0.2559760885  | 0.4790483332 | 0.0007572155 | -532.69  | -0.2700 |
| O              | 0.2544989071  | 0.5208453471 | 0.4992414369 | -532.71  | -0.2702 |
| O              | 0.7455010639  | 0.0208453631 | 0.0007585491 | -532.71  | -0.2702 |
| O              | 0.7455010639  | 0.4791546229 | 0.5007585631 | -532.71  | -0.2702 |
| O              | 0.2544989071  | 0.9791546529 | 0.9992414369 | -532.71  | -0.2702 |
| O              | 0.7542296038  | 0.9949350308 | 0.7545131765 | -335.55  | 1.4153  |
| O              | 0.2457703812  | 0.4949350008 | 0.7454868235 | -335.55  | 1.4153  |
| O              | 0.2457703812  | 0.0050649842 | 0.2454868525 | -335.55  | 1.4153  |
| O              | 0.7542296038  | 0.5050649692 | 0.2545131475 | -335.55  | 1.4153  |
| O              | 0.7548068165  | 0.5051060869 | 0.7545141586 | -335.50  | 1.4157  |
| O              | 0.2451932135  | 0.0051061019 | 0.7454858414 | -335.50  | 1.4157  |
| O              | 0.2451932135  | 0.4948939131 | 0.2454858414 | -335.50  | 1.4157  |
| O              | 0.7548068165  | 0.9948939131 | 0.2545141586 | -335.50  | 1.4157  |
| O              | -0.0003186670 | 0.7390729810 | 0.7442028245 | -487.35  | -0.5429 |
| O              | 1.0003186600  | 0.2390729810 | 0.7557971755 | -487.35  | -0.5429 |
| O              | 1.0003186600  | 0.2609270190 | 0.2557971755 | -487.35  | -0.5429 |
| O              | -0.0003186670 | 0.7609270190 | 0.2442028245 | -487.35  | -0.5429 |
| O              | 0.4888034327  | 0.7390500995 | 0.2440874799 | -487.31  | -0.5426 |
| O              | 0.5111965373  | 0.2390500705 | 0.2559125051 | -487.31  | -0.5426 |
| O              | 0.5111965373  | 0.2609499295 | 0.7559124901 | -487.31  | -0.5426 |
| O              | 0.4888034327  | 0.7609499005 | 0.7440875099 | -487.31  | -0.5426 |
| V <sub>x</sub> | 7.399921595   | 0.000000000  | -0.014594631 |          |         |
| V <sub>y</sub> | 0.000000000   | 7.854724055  | 0.000000000  |          |         |
| V <sub>z</sub> | -7.382519462  | 0.000000000  | 8.109404975  |          |         |

**Table S11.** Atomic crystallographic positions with vectors lattice in Angstrom of Nb<sub>2</sub>O<sub>5</sub> with total chemical shift  $\sigma$  in ppm and quadrupolar coupling constant  $C_Q$  in MHz for each element.

| Atom           | x             | y             | z            | $\sigma$ | $C_Q$   |
|----------------|---------------|---------------|--------------|----------|---------|
| Nb             | 0.8403852901  | 0.9896705061  | 0.8344341284 | 55.51    | -1.0974 |
| Nb             | 0.5786625748  | 0.4986669938  | 0.7035403037 | 30.08    | -1.1044 |
| Nb             | 0.9961492286  | 0.0077837199  | 0.7631602489 | 113.17   | -1.1599 |
| Nb             | 0.8445850745  | 0.9756817224  | 0.5667180046 | 212.94   | -2.9258 |
| Nb             | 0.3067989793  | 0.0029924778  | 0.6287878940 | 110.32   | -0.9506 |
| Nb             | 0.0038507944  | 0.0077837199  | 0.2368397811 | 113.17   | -1.1599 |
| Nb             | 0.8482376602  | 0.9935500229  | 0.3035479036 | 106.87   | -1.2767 |
| Nb             | 0.2660219738  | 0.4946178321  | 0.8410828457 | 97.30    | -1.4469 |
| Nb             | 0.6852480663  | -0.0020828362 | 0.6392903432 | 20.30    | 1.0843  |
| Nb             | 0.3147519337  | -0.0020828362 | 0.3607096568 | 20.30    | 1.0843  |
| Nb             | 0.1517623248  | 0.9935500229  | 0.6964520664 | 106.87   | -1.2767 |
| Nb             | 0.4682356352  | -0.0012556506 | 0.5622151869 | -3.81    | 1.5910  |
| Nb             | 0.8894756303  | 0.5129696084  | 0.0929812847 | 102.55   | -2.2404 |
| Nb             | 0.4191931607  | 0.5009956199  | 0.7708462238 | 105.30   | -1.2257 |
| Nb             | 0.7349057821  | 0.4959014499  | 0.8982584815 | 114.89   | -0.5427 |
| Nb             | 0.5752973301  | 0.5299274238  | 0.9645232922 | 262.04   | -2.8895 |
| Nb             | 0.4213374552  | 0.4986669938  | 0.2964596963 | 30.08    | -1.1044 |
| Nb             | -0.0000000000 | 0.0252180109  | 0.5000000000 | 329.21   | -3.6313 |
| Nb             | 0.0000000000  | 0.2367376619  | 0.0000000000 | -104.36  | 2.2843  |
| Nb             | 0.1105243697  | 0.5129696084  | 0.9070186853 | 102.55   | -2.2404 |
| Nb             | 0.5317643348  | -0.0012556506 | 0.4377847831 | -3.81    | 1.5910  |
| Nb             | 0.1554149255  | 0.9756817224  | 0.4332820254 | 212.94   | -2.9258 |
| Nb             | 0.5808068393  | 0.5009956199  | 0.2291537612 | 105.30   | -1.2257 |
| Nb             | 0.7339779962  | 0.4946178321  | 0.1589171393 | 97.30    | -1.4469 |
| Nb             | 0.1596146949  | 0.9896705061  | 0.1655658866 | 55.51    | -1.0974 |
| Nb             | 0.6932009907  | 0.0029924778  | 0.3712121060 | 110.32   | -0.9506 |
| Nb             | 0.4247026699  | 0.5299274238  | 0.0354767308 | 262.04   | -2.8895 |
| Nb             | 0.2650941879  | 0.4959014499  | 0.1017415105 | 114.89   | -0.5427 |
| O              | 0.8179993134  | 0.5006526474  | 0.1318724039 | -352.40  | -0.1563 |
| O              | 0.6605052954  | 0.4978967828  | 0.0665607685 | -352.53  | -0.2364 |
| O              | 0.2455289535  | 0.9974543597  | 0.8132043638 | -214.21  | 0.8092  |
| O              | 0.4228918230  | -0.0011349731 | 0.4617609391 | -223.89  | 0.3513  |
| O              | 0.9133434024  | 0.9952863413  | 0.9390846111 | -328.81  | 0.5737  |
| O              | 0.9862431208  | 0.5050602260  | 0.2064276903 | -182.89  | 0.8277  |
| O              | 0.5948123435  | 1.0010187935  | 0.2588867769 | -174.46  | 0.8753  |
| O              | 0.9207549919  | 0.9898862953  | 0.5363300571 | -388.25  | -0.5820 |
| O              | 0.5771081770  | -0.0011349731 | 0.5382390609 | -223.89  | 0.3513  |
| O              | 0.8346716148  | 0.4960225175  | 0.5735095494 | -373.03  | -0.5793 |
| O              | 0.6589454140  | 0.5002198051  | 0.2013904595 | -357.69  | -0.2044 |
| O              | 0.4988361973  | 0.5020295816  | 0.8618365044 | -341.74  | -0.3966 |
| O              | 0.5737352800  | -0.0012393233 | 0.6708129607 | -24.61   | -0.6620 |
| O              | 0.1653284152  | 0.4960225175  | 0.4264904206 | -373.03  | -0.5793 |
| O              | 0.4051876565  | 1.0010187935  | 0.7411132521 | -174.46  | 0.8753  |
| O              | 0.6595627915  | 0.4986194907  | 0.7913024237 | -336.30  | -0.6806 |
| O              | 0.3353289098  | 0.5016175716  | 0.6529911951 | -180.67  | 0.8725  |
| O              | 0.4960706670  | 0.4989270566  | 0.5855948840 | -129.62  | -1.0328 |
| O              | 0.5851049912  | 1.0061572148  | 0.9629368740 | -378.09  | -0.3768 |
| O              | 0.3410546160  | 0.5002198051  | 0.7986095545 | -357.69  | -0.2044 |
| O              | 0.0819419091  | 0.0058635288  | 0.3266533823 | -343.90  | -0.3499 |
| O              | 0.7537941703  | 0.9993245075  | 0.7373451036 | -329.75  | -0.4177 |
| O              | 0.6569512489  | 0.4985487800  | 0.6454756875 | -165.40  | 0.8617  |
| O              | 0.9236472674  | 0.0015993666  | 0.2644811202 | -357.60  | -0.2627 |
| O              | 0.1795287699  | 0.4956181685  | 0.1530342317 | -203.93  | 0.7877  |
| O              | 0.7617395176  | 0.0028209231  | 0.4659665898 | -336.51  | -0.4602 |
| O              | 0.5039293330  | 0.4989270566  | 0.4144051160 | -129.62  | -1.0328 |
| O              | 0.2379520767  | 0.0006445219  | 0.6684040561 | -366.12  | -0.2876 |
| O              | 0.3928551459  | 0.9996192150  | 0.5890617082 | -377.07  | 0.1017  |
| O              | 0.1738780251  | 0.4973345305  | 0.7231075887 | -218.88  | 0.8082  |
| O              | 0.1820006716  | 0.5006526474  | 0.8681276111 | -352.40  | -0.1563 |
| O              | -0.0000000000 | 0.4992585539  | 0.5000000000 | -354.18  | -0.6017 |
| O              | 0.9736070568  | 0.5063504223  | 0.0596079184 | -329.14  | 0.4294  |
| O              | 0.4262647200  | -0.0012393233 | 0.3291870393 | -24.61   | -0.6620 |
| O              | 0.0866565826  | 0.9952863413  | 0.0609153779 | -328.81  | 0.5737  |
| O              | 0.8185113743  | 0.5037643538  | 0.9969515820 | -325.93  | -0.6212 |
| O              | 0.9180580989  | 0.0058635288  | 0.6733466177 | -343.90  | -0.3499 |
| O              | 0.5011637727  | 0.5020295816  | 0.1381634956 | -341.74  | -0.3966 |
| O              | 0.4148947788  | 1.0061572148  | 0.0370631110 | -378.09  | -0.3768 |
| O              | 0.0813058163  | 0.9943734053  | 0.6027063563 | -356.72  | -0.2501 |
| O              | 0.3404372085  | 0.4986194907  | 0.2086975613 | -336.30  | -0.6806 |
| O              | 0.0856914392  | 0.9964471979  | 0.1953851800 | -352.26  | -0.2542 |
| O              | 0.9143085758  | 0.9964471979  | 0.8046148350 | -352.26  | -0.2542 |
| O              | 0.4988159509  | 0.4997126787  | 0.2719974107 | -368.08  | 0.5260  |
| O              | 0.7620479083  | 0.0006445219  | 0.3315959439 | -366.12  | -0.2876 |
| O              | 0.7544710465  | 0.9974543597  | 0.1867956212 | -214.21  | 0.8092  |
| O              | 0.7468901588  | -0.0035211251 | 0.5971879766 | -403.76  | -0.1210 |
| O              | 0.0137568712  | 0.5050602260  | 0.7935723247 | -182.89  | 0.8277  |
| O              | 0.8261220049  | 0.4973345305  | 0.2768924113 | -218.88  | 0.8082  |
| O              | 0.8204712001  | 0.4956181685  | 0.8469657533 | -203.93  | 0.7877  |
| O              | 0.9186941837  | 0.9943734053  | 0.3972936437 | -356.72  | -0.2501 |
| O              | 0.3430487811  | 0.4985487800  | 0.3545243125 | -165.40  | 0.8617  |
| O              | 0.2531098412  | -0.0035211251 | 0.4028120234 | -403.76  | -0.1210 |
| O              | 0.0852157471  | 0.0062415149  | 0.8821551111 | -188.23  | 0.8791  |
| O              | 0.6608069808  | 0.5000400369  | 0.9268392034 | -387.29  | 0.1132  |
| O              | 0.6646710602  | 0.5016175716  | 0.3470088339 | -180.67  | 0.8725  |
| O              | 0.1814886257  | 0.5037643538  | 0.0030484260 | -325.93  | -0.6212 |
| O              | 0.5011840791  | 0.4997126787  | 0.7280025593 | -368.08  | 0.5260  |
| O              | 0.0263929432  | 0.5063504223  | 0.9403920666 | -329.14  | 0.4294  |
| O              | 0.6071448841  | 0.9996192150  | 0.4109382628 | -377.07  | 0.1017  |
| O              | 0.0792449861  | 0.9898862953  | 0.4636699429 | -388.25  | -0.5820 |
| O              | 0.2382604524  | 0.0028209231  | 0.5340334102 | -336.51  | -0.4602 |
| O              | 0.5000000000  | 0.5089230610  | 0.0000000000 | -365.57  | -0.4945 |
| O              | 0.9147842759  | 0.0062415149  | 0.1178448589 | -188.23  | 0.8791  |
| O              | 0.0763527096  | 0.0015993666  | 0.7355188798 | -357.60  | -0.2627 |
| O              | 0.3394947046  | 0.4978967828  | 0.9334392385 | -352.53  | -0.2364 |
| O              | 0.7523456305  | 0.9972562578  | 0.8852801044 | -206.19  | 0.6238  |
| O              | 0.3391930192  | 0.5000400369  | 0.0731607966 | -387.29  | 0.1132  |
| O              | 0.2476543695  | 0.9972562578  | 0.1147199256 | -206.19  | 0.6238  |
| O              | 0.2462058297  | 0.9993245075  | 0.2626549264 | -329.75  | -0.4177 |
| V <sub>x</sub> | 19.621480124  | 0.0000000000  | 0.001491035  |          |         |
| V <sub>y</sub> | 0.0000000000  | 3.843701415   | 0.0000000000 |          |         |
| V <sub>z</sub> | -8.951671660  | 0.0000000000  | 18.598303331 |          |         |

**Table S12.** Atomic crystallographic positions with vectors lattice in Angstrom of OsO<sub>4</sub> with total chemical shift  $\sigma$  in ppm and quadrupolar coupling constant  $C_Q$  in MHz for each element.

| Atom           | x             | y            | z            | $\sigma$ | $C_Q$   |
|----------------|---------------|--------------|--------------|----------|---------|
| Os             | 0.4999993101  | 0.7540354176 | 0.2499989704 | -2337.30 | -0.0628 |
| Os             | 0.5000006899  | 0.2459645974 | 0.7500010296 | -2337.30 | -0.0628 |
| Os             | 0.0000006221  | 0.2540324733 | 0.2499994966 | -2337.06 | -0.0602 |
| Os             | -0.0000006221 | 0.7459675267 | 0.7500005034 | -2337.06 | -0.0602 |
| O              | 0.1113188017  | 0.0496518339 | 0.1975590528 | -468.88  | 0.7504  |
| O              | 0.3886812436  | 0.5496517558 | 0.3024407524 | -468.87  | 0.7508  |
| O              | 0.8886811683  | 0.9503481921 | 0.8024409472 | -468.88  | 0.7504  |
| O              | 0.6113187864  | 0.4503482142 | 0.6975592476 | -468.87  | 0.7508  |
| O              | 0.6077527560  | 0.9585511976 | 0.4111108072 | -468.17  | 0.7613  |
| O              | 0.3922486298  | 0.9585500863 | 0.0888904662 | -468.16  | 0.7611  |
| O              | 0.3922472440  | 0.0414488244 | 0.5888891928 | -468.17  | 0.7613  |
| O              | 0.6077513702  | 0.0414499357 | 0.9111095338 | -468.16  | 0.7611  |
| O              | 0.6113196977  | 0.5496513204 | 0.1975595312 | -468.87  | 0.7508  |
| O              | 0.8886808339  | 0.0496511862 | 0.3024402045 | -468.89  | 0.7506  |
| O              | 0.3886803323  | 0.4503486496 | 0.8024404688 | -468.87  | 0.7508  |
| O              | 0.1113191361  | 0.9503488398 | 0.6975597955 | -468.89  | 0.7506  |
| O              | 0.1077522813  | 0.4585504524 | 0.4111100972 | -468.20  | 0.7615  |
| O              | 0.8922477489  | 0.4585506764 | 0.0888891732 | -468.19  | 0.7615  |
| O              | 0.8922477187  | 0.5414495176 | 0.5888899028 | -468.20  | 0.7615  |
| O              | 0.1077522511  | 0.5414492936 | 0.9111108268 | -468.19  | 0.7615  |
| V <sub>x</sub> | 9.980530711   | 0.000005367  | -0.007467201 |          |         |
| V <sub>y</sub> | 0.000002556   | 4.821342315  | 0.000000698  |          |         |
| V <sub>z</sub> | -4.006547169  | -0.000000370 | 8.204425895  |          |         |

**Table S13.** Atomic crystallographic positions with vectors lattice in Angstrom of PdN<sub>2</sub> with total chemical shift  $\sigma$  in ppm and quadrupolar coupling constant  $C_Q$  in MHz for each element.

| Atom           | x             | y             | z             | $\sigma$ | $C_Q$   |
|----------------|---------------|---------------|---------------|----------|---------|
| Pd             | 0.5000000000  | 0.5000000000  | -0.0000000000 | -3407.89 | -0.3730 |
| Pd             | 0.5000000000  | 0.0000000000  | 0.5000000000  | -3407.89 | -0.3730 |
| Pd             | -0.0000000000 | 0.5000000000  | 0.5000000000  | -3407.89 | -0.3730 |
| Pd             | 0.0000000000  | -0.0000000000 | -0.0000000000 | -3407.89 | -0.3730 |
| N              | 0.0704848304  | 0.9295151556  | 0.4295151846  | 215.76   | -0.3262 |
| N              | 0.9295151556  | 0.4295151846  | 0.0704848304  | 215.76   | -0.3262 |
| N              | 0.4295151846  | 0.0704848304  | 0.9295151556  | 215.76   | -0.3262 |
| N              | 0.5704848444  | 0.5704848444  | 0.5704848444  | 215.76   | -0.3262 |
| N              | 0.9295151556  | 0.0704848304  | 0.5704848444  | 215.76   | -0.3262 |
| N              | 0.0704848304  | 0.5704848444  | 0.9295151556  | 215.76   | -0.3262 |
| N              | 0.5704848444  | 0.9295151556  | 0.0704848304  | 215.76   | -0.3262 |
| N              | 0.4295151846  | 0.4295151846  | 0.4295151846  | 215.76   | -0.3262 |
| V <sub>x</sub> | 5.064616944   | 0.000000000   | 0.000000000   |          |         |
| V <sub>y</sub> | 0.000000000   | 5.064616944   | 0.000000000   |          |         |
| V <sub>z</sub> | 0.000000000   | 0.000000000   | 5.064616944   |          |         |

**Table S14.** Atomic crystallographic positions with vectors lattice in Angstrom of PtO<sub>2</sub> with total chemical shift  $\sigma$  in ppm and quadrupolar coupling constant  $C_Q$  in MHz for each element.

| Atom  | x             | y             | z             | $\sigma$ | $C_Q$   |
|-------|---------------|---------------|---------------|----------|---------|
| Pt    | 0.3333333430  | 0.6666666870  | 0.0000435581  | -7557.22 | 1.1975  |
| Pt    | 0.6666666870  | 0.3333333430  | 0.5000435381  | -7557.22 | 1.1975  |
| O     | -0.0000000000 | -0.0000000000 | 0.5873010608  | 255.86   | -1.7944 |
| O     | -0.0000000000 | -0.0000000000 | 0.0873010388  | 255.86   | -1.7944 |
| O     | 0.6666666870  | 0.3333333430  | 0.9126564140  | 256.02   | -1.7843 |
| O     | 0.3333333430  | 0.6666666870  | 0.4126564140  | 256.02   | -1.7843 |
| $V_x$ | 3.161782816   | -0.0000000000 | -0.0000000000 |          |         |
| $V_y$ | -1.580891408  | 2.738184240   | 0.0000000000  |          |         |
| $V_z$ | -0.0000000000 | 0.0000000000  | 10.666756076  |          |         |

**Table S15.** Atomic crystallographic positions with vectors lattice in Angstrom of  $\text{Re}_2\text{O}_7$  with total chemical shift  $\sigma$  in ppm and quadrupolar coupling constant  $C_Q$  in MHz for each element.

| Atom           | x             | y             | z            | $\sigma$ | $C_Q$   |
|----------------|---------------|---------------|--------------|----------|---------|
| Re             | 0.0499739141  | 0.0355920891  | 0.6437929397 | -1236.60 | 4.0581  |
| Re             | 0.6775907943  | 0.0224646167  | 0.3591243917 | -892.00  | 2.8246  |
| Re             | 0.8167963524  | 0.2080685572  | 0.1405873747 | -884.18  | 2.7990  |
| Re             | 0.5501984729  | 0.2352363668  | 0.6447870899 | -1243.51 | 4.0667  |
| Re             | 0.0501984579  | 0.2647636482  | 0.3552129101 | -1243.51 | 4.0667  |
| Re             | 0.3167963524  | 0.2919314578  | 0.8594126103 | -884.18  | 2.7990  |
| Re             | 0.1775907793  | 0.4775353883  | 0.6408755793 | -892.00  | 2.8246  |
| Re             | 0.5499739291  | 0.4644079149  | 0.3562070603 | -1236.60 | 4.0581  |
| Re             | 0.9500260709  | 0.5355920851  | 0.8562070603 | -1236.60 | 4.0581  |
| Re             | 0.3224092347  | 0.5224646117  | 0.1408756083 | -892.00  | 2.8246  |
| Re             | 0.1832036476  | 0.7080685722  | 0.3594126103 | -884.18  | 2.7990  |
| Re             | 0.4498015271  | 0.7352363818  | 0.8552129101 | -1243.51 | 4.0667  |
| Re             | 0.9498015271  | 0.7647636182  | 0.1447870749 | -1243.51 | 4.0667  |
| Re             | 0.6832036476  | 0.7919314278  | 0.6405873897 | -884.18  | 2.7990  |
| Re             | 0.8224092057  | 0.9775353883  | 0.8591244207 | -892.00  | 2.8246  |
| Re             | 0.4500260709  | 0.9644079149  | 0.1437929397 | -1236.60 | 4.0581  |
| O              | 0.5059138729  | -0.0089600674 | 0.2705483324 | -179.35  | 1.2505  |
| O              | 0.9791420195  | 0.0042218447  | 0.9459777243 | -511.74  | -0.4327 |
| O              | -0.0045481450 | 0.0586000238  | 0.5430603196 | -572.51  | 1.1374  |
| O              | 0.5686187984  | 0.0509067635  | 0.8587511650 | -482.88  | 0.7891  |
| O              | 0.2480096444  | 0.0631849593  | 0.1409721558 | -543.54  | 1.0832  |
| O              | 0.7278711243  | 0.0762546265  | 0.1424184945 | -165.65  | 1.3137  |
| O              | 0.7387713958  | 0.1295595220  | 0.6698824599 | -254.63  | 0.9196  |
| O              | 0.2391053342  | 0.1407166503  | 0.6695885268 | -256.69  | 0.9117  |
| O              | 0.2521865221  | 0.1658953584  | 0.3562544622 | -540.16  | 1.0963  |
| O              | 0.7707588624  | 0.1536319191  | 0.3560989186 | -169.18  | 1.3192  |
| O              | 0.0610039692  | 0.2199425867  | 0.8566756929 | -482.72  | 0.8028  |
| O              | 0.4981066374  | 0.2141603352  | 0.5437616697 | -584.14  | 1.1599  |
| O              | 0.4679683839  | 0.2634403711  | 0.9469770500 | -511.88  | -0.4383 |
| O              | -0.0073863967 | 0.2393748907  | 0.2281715618 | -179.56  | 1.2258  |
| O              | 0.4926135763  | 0.2606251243  | 0.7718284232 | -179.56  | 1.2258  |
| O              | 0.9679683839  | 0.2365596439  | 0.0530229350 | -511.88  | -0.4383 |
| O              | -0.0018933786 | 0.2858396498  | 0.4562383303 | -584.14  | 1.1599  |
| O              | 0.5610039622  | 0.2800573993  | 0.1433242781 | -482.72  | 0.8028  |
| O              | 0.2707588624  | 0.3463680809  | 0.6439010814 | -169.18  | 1.3192  |
| O              | 0.7521865511  | 0.3341046416  | 0.6437455378 | -540.16  | 1.0963  |
| O              | 0.7391053042  | 0.3592833347  | 0.3304114432 | -256.69  | 0.9117  |
| O              | 0.2387713958  | 0.3704404780  | 0.3301175401 | -254.63  | 0.9196  |
| O              | 0.2278711543  | 0.4237453655  | 0.8575814755 | -165.65  | 1.3137  |
| O              | 0.7480096294  | 0.4368150337  | 0.8590278372 | -543.54  | 1.0832  |
| O              | 0.0686187914  | 0.4490932255  | 0.1412488350 | -482.88  | 0.7891  |
| O              | 0.4954518250  | 0.4413999792  | 0.4569396504 | -572.51  | 1.1374  |
| O              | 0.4791420495  | 0.4957781533  | 0.0540222977 | -511.74  | -0.4327 |
| O              | 1.0059138729  | 0.5089600764  | 0.7294516386 | -179.35  | 1.2505  |
| O              | 0.4940861271  | 0.4910399536  | 0.2294516536 | -179.35  | 1.2505  |
| O              | 0.0208579545  | 0.5042218467  | 0.5540222757 | -511.74  | -0.4327 |
| O              | 1.0045481750  | 0.5586000498  | 0.9569396804 | -572.51  | 1.1374  |
| O              | 0.4313812016  | 0.5509067445  | 0.6412488350 | -482.88  | 0.7891  |
| O              | 0.7519903707  | 0.5631849663  | 0.3590278372 | -543.54  | 1.0832  |
| O              | 0.2721288457  | 0.5762546045  | 0.3575815055 | -165.65  | 1.3137  |
| O              | 0.2612286192  | 0.6295595220  | 0.8301175401 | -254.63  | 0.9196  |
| O              | 0.7608946958  | 0.6407166353  | 0.8304114732 | -256.69  | 0.9117  |
| O              | 0.7478134489  | 0.6658953874  | 0.1437455378 | -540.16  | 1.0963  |
| O              | 0.2292411376  | 0.6536318891  | 0.1439010814 | -169.18  | 1.3192  |
| O              | 0.9389960378  | 0.7199425717  | 0.6433243071 | -482.72  | 0.8028  |
| O              | 0.5018933926  | 0.7141603202  | 0.9562383303 | -584.14  | 1.1599  |
| O              | 0.5320316161  | 0.7634403561  | 0.5530229500 | -511.88  | -0.4383 |
| O              | 1.0073864237  | 0.7393748757  | 0.2718284232 | -179.56  | 1.2258  |
| O              | 0.5073863937  | 0.7606251243  | 0.7281715768 | -179.56  | 1.2258  |
| O              | 0.0320316041  | 0.7365596439  | 0.4469770500 | -511.88  | -0.4383 |
| O              | 1.0018933626  | 0.7858396798  | 0.0437616637 | -584.14  | 1.1599  |
| O              | 0.4389960378  | 0.7800574283  | 0.3566757219 | -482.72  | 0.8028  |
| O              | 0.7292411376  | 0.8463681109  | 0.8560989186 | -169.18  | 1.3192  |
| O              | 0.2478134779  | 0.8341046126  | 0.8562544622 | -540.16  | 1.0963  |
| O              | 0.2608946658  | 0.8592833647  | 0.1695885418 | -256.69  | 0.9117  |
| O              | 0.7612286042  | 0.8704404780  | 0.1698824449 | -254.63  | 0.9196  |
| O              | 0.7721288757  | 0.9237453955  | 0.6424185245 | -165.65  | 1.3137  |
| O              | 0.2519903707  | 0.9368150337  | 0.6409721628 | -543.54  | 1.0832  |
| O              | 0.9313812016  | 0.9490932555  | 0.3587511650 | -482.88  | 0.7891  |
| O              | 0.5045481450  | 0.9413999502  | 0.0430603496 | -572.51  | 1.1374  |
| O              | 0.5208579805  | 0.9957781533  | 0.4459776953 | -511.74  | -0.4327 |
| O              | -0.0059138789 | 1.0089600464  | 0.7705483614 | -179.35  | 1.2505  |
| V <sub>x</sub> | 5.526923280   | 0.000000000   | 0.000000000  |          |         |
| V <sub>y</sub> | 0.000000000   | 12.930866795  | 0.000000000  |          |         |
| V <sub>z</sub> | 0.000000000   | 0.000000000   | 16.263494170 |          |         |

**Table S16.** Atomic crystallographic positions with vectors lattice in Angstrom of Rh<sub>2</sub>O<sub>3</sub> with total chemical shift  $\sigma$  in ppm and quadrupolar coupling constant  $C_Q$  in MHz for each element.

| Atom           | x             | y             | z            | $\sigma$  | $C_Q$   |
|----------------|---------------|---------------|--------------|-----------|---------|
| Rh             | 0.6666666870  | 0.3333333430  | 0.1826301413 | -10833.77 | 0.0448  |
| Rh             | 0.3333333430  | 0.6666666870  | 0.3173698608 | -10833.59 | 0.0448  |
| Rh             | -0.0000000000 | -0.0000000000 | 0.1507049531 | -10825.85 | 0.0461  |
| Rh             | 0.3333333430  | 0.6666666870  | 0.0159582872 | -10829.52 | 0.0450  |
| Rh             | 0.3333333430  | 0.6666666870  | 0.5159582877 | -10829.69 | 0.0450  |
| Rh             | -0.0000000000 | -0.0000000000 | 0.6507049812 | -10825.67 | 0.0461  |
| Rh             | 0.6666666870  | 0.3333333430  | 0.4840417123 | -10829.69 | 0.0450  |
| Rh             | -0.0000000000 | -0.0000000000 | 0.3492950488 | -10825.67 | 0.0461  |
| Rh             | -0.0000000000 | -0.0000000000 | 0.8492950169 | -10825.85 | 0.0461  |
| Rh             | 0.6666666870  | 0.3333333430  | 0.9840417248 | -10829.52 | 0.0450  |
| Rh             | 0.3333333430  | 0.6666666870  | 0.8173698437 | -10833.77 | 0.0448  |
| Rh             | 0.6666666870  | 0.3333333430  | 0.6826301392 | -10833.59 | 0.0448  |
| O              | 0.9664330099  | 0.6330980362  | 0.0833323521 | 370.84    | -1.0910 |
| O              | 0.6666650274  | 0.0335669721  | 0.0833323521 | 370.84    | -1.0910 |
| O              | 0.3669019638  | 0.3333350026  | 0.0833323521 | 370.84    | -1.0910 |
| O              | 0.7003153226  | 0.7003153194  | 0.2500000076 | 370.89    | -1.0908 |
| O              | -0.0000000032 | 0.2996846474  | 0.2500000076 | 370.89    | -1.0908 |
| O              | 0.2996846506  | 0.0000000032  | 0.2500000076 | 370.89    | -1.0908 |
| O              | 0.6330980401  | 0.9664330038  | 0.4166676473 | 370.84    | -1.0910 |
| O              | 0.3333349927  | 0.3669019599  | 0.4166676473 | 370.84    | -1.0910 |
| O              | 0.0335669782  | 0.6666650373  | 0.4166676473 | 370.84    | -1.0910 |
| O              | 0.3669019599  | 0.0335669782  | 0.5833323227 | 370.84    | -1.0910 |
| O              | 0.6666650373  | 0.6330980401  | 0.5833323227 | 370.84    | -1.0910 |
| O              | 0.9664330038  | 0.3333349927  | 0.5833323227 | 370.84    | -1.0910 |
| O              | 0.2996846474  | 0.2996846506  | 0.7499999924 | 370.89    | -1.0908 |
| O              | 0.0000000032  | 0.7003153226  | 0.7499999924 | 370.89    | -1.0908 |
| O              | 0.7003153194  | -0.0000000032 | 0.7499999924 | 370.89    | -1.0908 |
| O              | 0.0335669721  | 0.3669019638  | 0.9166676629 | 370.84    | -1.0910 |
| O              | 0.3333350026  | 0.9664330099  | 0.9166676629 | 370.84    | -1.0910 |
| O              | 0.6330980362  | 0.6666650274  | 0.9166676629 | 370.84    | -1.0910 |
| V <sub>x</sub> | 5.183533355   | 0.000000000   | 0.000000000  |           |         |
| V <sub>y</sub> | -2.591766677  | 4.489071567   | 0.000000000  |           |         |
| V <sub>z</sub> | -0.000000000  | -0.000000000  | 14.029810312 |           |         |

**Table S17.** Atomic crystallographic positions with vectors lattice in Angstrom of RuO<sub>4</sub> with total chemical shift  $\sigma$  in ppm and quadrupolar coupling constant  $C_Q$  in MHz for each element.

| Atom           | x            | y             | z             | $\sigma$ | $C_Q$   |
|----------------|--------------|---------------|---------------|----------|---------|
| Ru             | 0.7500000000 | 0.5000000000  | 0.0000000000  | -2963.34 | 0.0323  |
| Ru             | 0.5000000000 | 0.5000000000  | 0.5000000000  | -2982.70 | -0.0000 |
| Ru             | 0.5000000000 | 0.0000000000  | 0.2500000000  | -2963.34 | 0.0323  |
| Ru             | 0.0000000000 | 0.2500000000  | 0.5000000000  | -2963.34 | 0.0323  |
| Ru             | 0.0000000000 | -0.0000000000 | 0.0000000000  | -2982.70 | -0.0000 |
| Ru             | 0.2500000000 | 0.5000000000  | -0.0000000000 | -2963.34 | 0.0323  |
| Ru             | 0.5000000000 | -0.0000000000 | 0.7500000000  | -2963.34 | 0.0323  |
| Ru             | 0.0000000000 | 0.7500000000  | 0.5000000000  | -2963.34 | 0.0323  |
| O              | 0.6084008955 | 0.8917644690  | 0.6418734121  | -774.37  | 0.9824  |
| O              | 0.1082355460 | 0.3581265579  | 0.6084008955  | -774.37  | 0.9824  |
| O              | 0.3917644690 | 0.8915991045  | 0.8581265879  | -774.37  | 0.9824  |
| O              | 0.6082653236 | 0.3917346764  | 0.6082653236  | -776.61  | 0.9807  |
| O              | 0.8917346764 | 0.1082653236  | 0.1082653236  | -776.61  | 0.9807  |
| O              | 0.6084008955 | 0.1082355460  | 0.3581265579  | -774.37  | 0.9824  |
| O              | 0.6082355310 | 0.1084008955  | 0.8581265879  | -774.37  | 0.9824  |
| O              | 0.1084008955 | 0.8581265879  | 0.6082355310  | -774.37  | 0.9824  |
| O              | 0.1082653236 | 0.1082653236  | 0.8917346764  | -776.61  | 0.9807  |
| O              | 0.1418734421 | 0.6082355310  | 0.8915991045  | -774.37  | 0.9824  |
| O              | 0.8917644690 | 0.3581265579  | 0.3915991045  | -774.37  | 0.9824  |
| O              | 0.1418734421 | 0.3917644690  | 0.1084008955  | -774.37  | 0.9824  |
| O              | 0.1082653236 | 0.8917346764  | 0.1082653236  | -776.61  | 0.9807  |
| O              | 0.3581265579 | 0.6084008955  | 0.1082355460  | -774.37  | 0.9824  |
| O              | 0.3915991045 | 0.8917644690  | 0.3581265579  | -774.37  | 0.9824  |
| O              | 0.1082355460 | 0.6418734121  | 0.3915991045  | -774.37  | 0.9824  |
| O              | 0.3917346764 | 0.6082653236  | 0.6082653236  | -776.61  | 0.9807  |
| O              | 0.8915991045 | 0.8581265879  | 0.3917644690  | -774.37  | 0.9824  |
| O              | 0.6418734121 | 0.6084008955  | 0.8917644690  | -774.37  | 0.9824  |
| O              | 0.3581265579 | 0.3915991045  | 0.8917644690  | -774.37  | 0.9824  |
| O              | 0.8581265879 | 0.3917644690  | 0.8915991045  | -774.37  | 0.9824  |
| O              | 0.6082355310 | 0.8915991045  | 0.1418734421  | -774.37  | 0.9824  |
| O              | 0.3917346764 | 0.3917346764  | 0.3917346764  | -776.61  | 0.9807  |
| O              | 0.6082653236 | 0.6082653236  | 0.3917346764  | -776.61  | 0.9807  |
| O              | 0.6418734121 | 0.3915991045  | 0.1082355460  | -774.37  | 0.9824  |
| O              | 0.8915991045 | 0.1418734421  | 0.6082355310  | -774.37  | 0.9824  |
| O              | 0.1084008955 | 0.1418734421  | 0.3917644690  | -774.37  | 0.9824  |
| O              | 0.3915991045 | 0.1082355460  | 0.6418734121  | -774.37  | 0.9824  |
| O              | 0.8581265879 | 0.6082355310  | 0.1084008955  | -774.37  | 0.9824  |
| O              | 0.8917644690 | 0.6418734121  | 0.6084008955  | -774.37  | 0.9824  |
| O              | 0.3917644690 | 0.1084008955  | 0.1418734421  | -774.37  | 0.9824  |
| O              | 0.8917346764 | 0.8917346764  | 0.8917346764  | -776.61  | 0.9807  |
| V <sub>x</sub> | 9.089937250  | 0.000000000   | 0.000000000   |          |         |
| V <sub>y</sub> | 0.000000000  | 9.089937250   | 0.000000000   |          |         |
| V <sub>z</sub> | 0.000000000  | 0.000000000   | 9.089937250   |          |         |



**Table S18.** Atomic crystallographic positions with vectors lattice in Angstrom of  $\text{Sc}_2\text{O}_3$  with total chemical shift  $\sigma$  in ppm and quadrupolar coupling constant  $C_Q$  in MHz for each element.

| Atom           | x             | y             | z             | $\sigma$ | $C_Q$   |
|----------------|---------------|---------------|---------------|----------|---------|
| Sc             | 0.0000000000  | 0.5000000000  | -0.0000000000 | 694.11   | 1.1189  |
| Sc             | 0.0000000000  | 0.0000000000  | 0.5000000000  | 694.11   | 1.1189  |
| Sc             | 0.5000000000  | -0.0000000000 | 0.0000000000  | 694.11   | 1.1189  |
| Sc             | -0.0000000000 | -0.0000000000 | 0.0000000000  | 694.05   | 1.1203  |
| Sc             | 0.7497326949  | 0.2857352705  | 0.5000334421  | 672.23   | -0.6989 |
| Sc             | 0.2502485437  | 0.2137145615  | 0.5000090730  | 671.85   | -0.7034 |
| Sc             | 0.2857352705  | 0.5000334421  | 0.7497326949  | 672.23   | -0.6989 |
| Sc             | 0.2137145615  | 0.5000090730  | 0.2502485437  | 671.85   | -0.7034 |
| Sc             | 0.5000334421  | 0.7497326949  | 0.2857352705  | 672.23   | -0.6989 |
| Sc             | 0.5000090730  | 0.2502485437  | 0.2137145615  | 671.85   | -0.7034 |
| Sc             | 0.7497093587  | 0.2135816411  | 0.0000636551  | 671.81   | -0.7027 |
| Sc             | 0.2502697807  | 0.2858053410  | 0.0000244943  | 672.30   | -0.6998 |
| Sc             | 0.2135816411  | 0.0000636551  | 0.7497093587  | 671.81   | -0.7027 |
| Sc             | 0.2858053410  | 0.0000244943  | 0.2502697807  | 672.30   | -0.6998 |
| Sc             | 0.0000636551  | 0.7497093587  | 0.2135816411  | 671.81   | -0.7027 |
| Sc             | 0.0000244943  | 0.2502697807  | 0.2858053410  | 672.30   | -0.6998 |
| Sc             | 0.5000000000  | -0.0000000000 | 0.5000000000  | 694.35   | 1.1209  |
| Sc             | 0.5000000000  | 0.5000000000  | -0.0000000000 | 694.35   | 1.1209  |
| Sc             | -0.0000000000 | 0.5000000000  | 0.5000000000  | 694.35   | 1.1209  |
| Sc             | 0.5000000000  | 0.5000000000  | 0.5000000000  | 694.40   | 1.1203  |
| Sc             | 0.2502906413  | 0.7864183589  | -0.0000636551 | 671.81   | -0.7027 |
| Sc             | 0.7497302193  | 0.7141946590  | -0.0000244943 | 672.30   | -0.6998 |
| Sc             | 0.7864183589  | -0.0000636551 | 0.2502906413  | 671.81   | -0.7027 |
| Sc             | 0.7141946590  | -0.0000244943 | 0.7497302193  | 672.30   | -0.6998 |
| Sc             | -0.0000636551 | 0.2502906413  | 0.7864183589  | 671.81   | -0.7027 |
| Sc             | -0.0000244943 | 0.7497302193  | 0.7141946590  | 672.30   | -0.6998 |
| Sc             | 0.2502673051  | 0.7142647295  | 0.4999665579  | 672.23   | -0.6989 |
| Sc             | 0.7497514563  | 0.7862854385  | 0.4999909270  | 671.85   | -0.7034 |
| Sc             | 0.7142647295  | 0.4999665579  | 0.2502673051  | 672.23   | -0.6989 |
| Sc             | 0.7862854385  | 0.4999909270  | 0.7497514563  | 671.85   | -0.7034 |
| Sc             | 0.4999665579  | 0.2502673051  | 0.7142647295  | 672.23   | -0.6989 |
| Sc             | 0.4999909270  | 0.7497514563  | 0.7862854385  | 671.85   | -0.7034 |
| O              | 0.0955707735  | 0.3584799264  | 0.1311287663  | -211.57  | 0.3364  |
| O              | 0.4044328007  | 0.3584699358  | 0.8688786233  | -211.58  | 0.3297  |
| O              | 0.5954648710  | 0.1414530939  | 0.8688315029  | -211.43  | 0.3247  |
| O              | 0.9045002104  | 0.1414242891  | 0.1312181300  | -211.46  | 0.3314  |
| O              | 0.3584799264  | 0.1311287663  | 0.0955707735  | -211.57  | 0.3364  |
| O              | 0.3584699358  | 0.8688786233  | 0.4044328007  | -211.58  | 0.3297  |
| O              | 0.1414530939  | 0.8688315029  | 0.5954648710  | -211.43  | 0.3247  |
| O              | 0.1414242891  | 0.1312181300  | 0.9045002104  | -211.46  | 0.3314  |
| O              | 0.1311287663  | 0.0955707735  | 0.3584799264  | -211.57  | 0.3364  |
| O              | 0.8688786233  | 0.4044328007  | 0.3584699358  | -211.58  | 0.3297  |
| O              | 0.8688315029  | 0.5954648710  | 0.1414530939  | -211.43  | 0.3247  |
| O              | 0.1312181300  | 0.9045002104  | 0.1414242891  | -211.46  | 0.3314  |
| O              | 0.4045206840  | 0.1414841699  | 0.3688338510  | -211.83  | 0.3253  |
| O              | 0.0954466086  | 0.1415482366  | 0.6311984446  | -211.83  | 0.3308  |
| O              | 0.9044046002  | 0.3585424315  | 0.6311999946  | -212.01  | 0.3365  |
| O              | 0.5955380069  | 0.3584076408  | 0.3689243145  | -211.97  | 0.3293  |
| O              | 0.1414841699  | 0.3688338510  | 0.4045206840  | -211.83  | 0.3253  |
| O              | 0.1415482366  | 0.6311984446  | 0.0954466086  | -211.83  | 0.3308  |
| O              | 0.3585424315  | 0.6311999946  | 0.9044046002  | -212.01  | 0.3365  |
| O              | 0.3584076408  | 0.3689243145  | 0.5955380069  | -211.97  | 0.3293  |
| O              | 0.3688338510  | 0.4045206840  | 0.1414841699  | -211.83  | 0.3253  |
| O              | 0.6311984446  | 0.0954466086  | 0.1415482366  | -211.83  | 0.3308  |
| O              | 0.6311999946  | 0.9044046002  | 0.3585424315  | -212.01  | 0.3365  |
| O              | 0.3689243145  | 0.5955380069  | 0.3584076408  | -211.97  | 0.3293  |
| O              | 0.5954792860  | 0.8585158151  | 0.6311661790  | -211.83  | 0.3253  |
| O              | 0.9045534214  | 0.8584517484  | 0.3688015854  | -211.83  | 0.3308  |
| O              | 0.0955954298  | 0.6414575685  | 0.3688000354  | -212.01  | 0.3365  |
| O              | 0.4044619631  | 0.6415923592  | 0.6310757155  | -211.97  | 0.3293  |
| O              | 0.8585158151  | 0.6311661790  | 0.5954792860  | -211.83  | 0.3253  |
| O              | 0.8584517484  | 0.3688015854  | 0.9045534214  | -211.83  | 0.3308  |
| O              | 0.6414575685  | 0.3688000354  | 0.0955954298  | -212.01  | 0.3365  |
| O              | 0.6415923592  | 0.6310757155  | 0.4044619631  | -211.97  | 0.3293  |
| O              | 0.6311661790  | 0.5954792860  | 0.8585158151  | -211.83  | 0.3253  |
| O              | 0.3688015854  | 0.9045534214  | 0.8584517484  | -211.83  | 0.3308  |
| O              | 0.3688000354  | 0.0955954298  | 0.6414575685  | -212.01  | 0.3365  |
| O              | 0.6310757155  | 0.4044619631  | 0.6415923592  | -211.97  | 0.3293  |
| O              | 0.9044292565  | 0.6415200736  | 0.8688712187  | -211.57  | 0.3364  |
| O              | 0.5955671693  | 0.6415300642  | 0.1311213617  | -211.58  | 0.3297  |
| O              | 0.4045350990  | 0.8585468911  | 0.1311684821  | -211.43  | 0.3247  |
| O              | 0.0954998196  | 0.8585756959  | 0.8687818550  | -211.46  | 0.3314  |
| O              | 0.6415200736  | 0.8688712187  | 0.9044292565  | -211.57  | 0.3364  |
| O              | 0.6415300642  | 0.1311213617  | 0.5955671693  | -211.58  | 0.3297  |
| O              | 0.8585468911  | 0.1311684821  | 0.4045350990  | -211.43  | 0.3247  |
| O              | 0.8585756959  | 0.8687818550  | 0.0954998196  | -211.46  | 0.3314  |
| O              | 0.8688712187  | 0.9044292565  | 0.6415200736  | -211.57  | 0.3364  |
| O              | 0.1311213617  | 0.5955671693  | 0.6415300642  | -211.58  | 0.3297  |
| O              | 0.1311684821  | 0.4045350990  | 0.8585468911  | -211.43  | 0.3247  |
| O              | 0.8687818550  | 0.0954998196  | 0.8585756959  | -211.46  | 0.3314  |
| V <sub>x</sub> | 9.894558759   | -0.000091112  | -0.000091112  |          |         |
| V <sub>y</sub> | -0.000091112  | 9.894558759   | -0.000091112  |          |         |
| V <sub>z</sub> | -0.000091112  | -0.000091112  | 9.894558759   |          |         |

**Table S19.** Atomic crystallographic positions with vectors lattice in Angstrom of Ta<sub>2</sub>O<sub>5</sub> with total chemical shift  $\sigma$  in ppm and quadrupolar coupling constant  $C_Q$  in MHz for each element.

| Atom           | x             | y             | z             | $\sigma$ | $C_Q$   |
|----------------|---------------|---------------|---------------|----------|---------|
| Ta             | 0.1408293688  | 0.7526165543  | 0.7714563574  | 2529.32  | 2.7622  |
| Ta             | 0.3591706318  | 0.2526165721  | 0.7285436451  | 2529.32  | 2.7622  |
| Ta             | 0.3591706318  | 0.7473834455  | 0.2285436134  | 2529.32  | 2.7622  |
| Ta             | 0.1408293688  | 0.2473834279  | 0.2714563857  | 2529.32  | 2.7622  |
| Ta             | 0.6408293682  | 0.2526165845  | 0.7714563566  | 2529.32  | 2.7622  |
| Ta             | 0.8591706312  | 0.7526165421  | 0.7285436443  | 2529.32  | 2.7622  |
| Ta             | 0.8591706312  | 0.2473834157  | 0.2285436126  | 2529.32  | 2.7622  |
| Ta             | 0.6408293682  | 0.7473834579  | 0.2714563849  | 2529.32  | 2.7622  |
| O              | 0.2957029237  | 0.5679271353  | 0.8722757245  | -99.24   | -0.7898 |
| O              | 0.2042970764  | 0.0679271637  | 0.6277242769  | -99.24   | -0.7898 |
| O              | 0.2042970769  | 0.9320728612  | 0.1277242762  | -99.24   | -0.7898 |
| O              | 0.2957029242  | 0.4320728325  | 0.3722757236  | -99.24   | -0.7898 |
| O              | 0.0000000010  | 0.1098983592  | 0.2499999985  | -224.98  | -0.2314 |
| O              | -0.0000000010 | 0.8901016628  | 0.7500000015  | -224.98  | -0.2314 |
| O              | 0.3881151775  | 0.0509625369  | 0.0156100572  | -220.68  | 0.2181  |
| O              | 0.1118848195  | 0.5509625363  | 0.4843899434  | -220.68  | 0.2181  |
| O              | 0.1118848195  | 0.4490374702  | 0.9843899415  | -220.68  | 0.2181  |
| O              | 0.3881151775  | 0.9490374712  | 0.5156100573  | -220.68  | 0.2181  |
| O              | 0.7957029231  | 0.0679271608  | 0.8722757238  | -99.24   | -0.7898 |
| O              | 0.7042970758  | 0.5679271385  | 0.6277242764  | -99.24   | -0.7898 |
| O              | 0.7042970763  | 0.4320728357  | 0.1277242755  | -99.24   | -0.7898 |
| O              | 0.7957029236  | 0.9320728583  | 0.3722757231  | -99.24   | -0.7898 |
| O              | 0.5000000010  | 0.6098983302  | 0.2499999985  | -224.98  | -0.2314 |
| O              | 0.4999999990  | 0.3901016398  | 0.7500000015  | -224.98  | -0.2314 |
| O              | 0.8881151725  | 0.5509625298  | 0.0156100565  | -220.68  | 0.2181  |
| O              | 0.6118848225  | 0.0509625438  | 0.4843899427  | -220.68  | 0.2181  |
| O              | 0.6118848225  | 0.9490374781  | 0.9843899408  | -220.68  | 0.2181  |
| O              | 0.8881151725  | 0.4490374637  | 0.5156100566  | -220.68  | 0.2181  |
| V <sub>x</sub> | 12.820581888  | 0.0000000059  | 0.008537863   |          |         |
| V <sub>y</sub> | 0.0000000023  | 4.877946217   | -0.0000000007 |          |         |
| V <sub>z</sub> | -1.258918400  | -0.0000000014 | 5.387104323   |          |         |

**Table S20.** Atomic crystallographic positions with vectors lattice in Angstrom of  $\text{Tc}_2\text{O}_7$  with total chemical shift  $\sigma$  in ppm and quadrupolar coupling constant  $C_Q$  in MHz for each element.

| Atom  | x            | y             | z             | $\sigma$ | $C_Q$   |
|-------|--------------|---------------|---------------|----------|---------|
| Tc    | 0.8066899657 | 0.4885814018  | 0.6034021642  | -2249.87 | 0.4271  |
| Tc    | 0.3066899357 | 0.5114185982  | 0.8965978358  | -2249.87 | 0.4271  |
| Tc    | 0.6933100343 | 0.9885814018  | 0.3965978658  | -2249.87 | 0.4271  |
| Tc    | 0.1933100493 | 0.0114185852  | 0.1034021492  | -2249.87 | 0.4271  |
| Tc    | 0.1933100493 | 0.5114185982  | 0.3965978658  | -2249.87 | 0.4271  |
| Tc    | 0.6933100343 | 0.4885814018  | 0.1034021492  | -2249.87 | 0.4271  |
| Tc    | 0.3066899357 | 0.0114185852  | 0.6034021642  | -2249.87 | 0.4271  |
| Tc    | 0.8066899657 | 0.9885814018  | 0.8965978358  | -2249.87 | 0.4271  |
| O     | 0.5902686407 | 0.6263259347  | 0.5857744453  | -713.64  | -0.9957 |
| O     | 0.0902686407 | 0.3736740353  | 0.9142255547  | -713.64  | -0.9957 |
| O     | 0.9097313593 | 0.1263259567  | 0.4142255547  | -713.64  | -0.9957 |
| O     | 0.4097313593 | 0.8736740653  | 0.0857744453  | -713.64  | -0.9957 |
| O     | 0.4097313593 | 0.3736740353  | 0.4142255547  | -713.64  | -0.9957 |
| O     | 0.9097313593 | 0.6263259347  | 0.0857744453  | -713.64  | -0.9957 |
| O     | 0.0902686407 | 0.8736740653  | 0.5857744453  | -713.64  | -0.9957 |
| O     | 0.5902686407 | 0.1263259567  | 0.9142255547  | -713.64  | -0.9957 |
| O     | 0.0000000000 | -0.0000000000 | -0.0000000000 | -177.22  | 1.7940  |
| O     | 0.5000000000 | -0.0000000000 | 0.5000000000  | -177.22  | 1.7940  |
| O     | 0.5000000000 | 0.5000000000  | -0.0000000000 | -177.22  | 1.7940  |
| O     | 0.0000000000 | 0.5000000000  | 0.5000000000  | -177.22  | 1.7940  |
| O     | 0.7003605625 | 0.7892833352  | 0.8861694653  | -720.84  | -0.9862 |
| O     | 0.2003605475 | 0.2107166948  | 0.6138305347  | -720.84  | -0.9862 |
| O     | 0.7996394375 | 0.2892833052  | 0.1138305117  | -720.84  | -0.9862 |
| O     | 0.2996394675 | 0.7107166648  | 0.3861694953  | -720.84  | -0.9862 |
| O     | 0.2996394675 | 0.2107166948  | 0.1138305117  | -720.84  | -0.9862 |
| O     | 0.7996394375 | 0.7892833352  | 0.3861694953  | -720.84  | -0.9862 |
| O     | 0.2003605475 | 0.7107166648  | 0.8861694653  | -720.84  | -0.9862 |
| O     | 0.7003605625 | 0.2892833052  | 0.6138305347  | -720.84  | -0.9862 |
| O     | 0.9418592394 | 0.0413474684  | 0.7954651930  | -752.41  | -0.9409 |
| O     | 0.4418592394 | 0.9586525576  | 0.7045348070  | -752.41  | -0.9409 |
| O     | 0.5581407606 | 0.5413474424  | 0.2045348360  | -752.41  | -0.9409 |
| O     | 0.0581407676 | 0.4586525286  | 0.2954651640  | -752.41  | -0.9409 |
| O     | 0.0581407676 | 0.9586525576  | 0.2045348360  | -752.41  | -0.9409 |
| O     | 0.5581407606 | 0.0413474684  | 0.2954651640  | -752.41  | -0.9409 |
| O     | 0.4418592394 | 0.4586525286  | 0.7954651930  | -752.41  | -0.9409 |
| O     | 0.9418592394 | 0.5413474424  | 0.7045348070  | -752.41  | -0.9409 |
| $V_x$ | 5.949893651  | 0.0000000000  | 0.0000000000  |          |         |
| $V_y$ | 0.0000000000 | 7.878431267   | 0.0000000000  |          |         |
| $V_z$ | 0.0000000000 | 0.0000000000  | 14.170062543  |          |         |

**Table S21.** Atomic crystallographic positions with vectors lattice in Angstrom of V<sub>2</sub>O<sub>5</sub> with total chemical shift  $\sigma$  in ppm and quadrupolar coupling constant  $C_Q$  in MHz for each element.

| Atom           | x            | y            | z            | $\sigma$ | $C_Q$   |
|----------------|--------------|--------------|--------------|----------|---------|
| V              | 0.0000000000 | 0.3899109505 | 0.6482653330 | -1447.62 | -0.3493 |
| V              | 0.5000000000 | 0.6100890785 | 0.8517346670 | -1447.62 | -0.3493 |
| V              | 0.5000000000 | 0.6100890785 | 0.1482653180 | -1447.62 | -0.3493 |
| V              | 0.0000000000 | 0.3899109505 | 0.3517346970 | -1447.62 | -0.3493 |
| O              | 0.5000000000 | 0.4926626260 | 0.6814365967 | -261.93  | -0.9874 |
| O              | 0.0000000000 | 0.5073374030 | 0.8185634033 | -261.93  | -0.9874 |
| O              | 0.0000000000 | 0.5073374030 | 0.1814365817 | -261.93  | -0.9874 |
| O              | 0.5000000000 | 0.4926626260 | 0.3185634033 | -261.93  | -0.9874 |
| O              | 0.0000000000 | 0.0587383317 | 0.3563247267 | -863.14  | -0.6045 |
| O              | 0.5000000000 | 0.9412616723 | 0.1436752733 | -863.14  | -0.6045 |
| O              | 0.5000000000 | 0.9412616723 | 0.8563247267 | -863.14  | -0.6045 |
| O              | 0.5000000000 | 0.5002171728 | 0.0000000000 | -567.10  | -1.2239 |
| O              | 0.0000000000 | 0.4997828272 | 0.5000000000 | -567.10  | -1.2239 |
| O              | 0.0000000000 | 0.0587383317 | 0.6436752733 | -863.14  | -0.6045 |
| V <sub>x</sub> | 3.566211263  | 0.0000000000 | 0.0000000000 |          |         |
| V <sub>y</sub> | 0.0000000000 | 4.791472504  | 0.0000000000 |          |         |
| V <sub>z</sub> | 0.0000000000 | 0.0000000000 | 11.533825939 |          |         |

**Table S22.** Atomic crystallographic positions with vectors lattice in Angstrom of WO<sub>3</sub> with total chemical shift  $\sigma$  in ppm and quadrupolar coupling constant  $C_Q$  in MHz for each element.

| Atom           | x            | y            | z            | $\sigma$ | $C_Q$   |
|----------------|--------------|--------------|--------------|----------|---------|
| W              | 0.0000000000 | 0.5000000000 | 0.2185355575 | 752.99   | 5.1767  |
| W              | 0.0000000000 | 0.5000000000 | 0.7185355575 | 752.99   | 5.1767  |
| W              | 0.5000000000 | 0.0000000000 | 0.2814644425 | 752.99   | 5.1767  |
| W              | 0.5000000000 | 0.0000000000 | 0.7814644425 | 752.99   | 5.1767  |
| O              | 0.2633721485 | 0.2633721485 | 0.7500000000 | -230.70  | 0.6438  |
| O              | 0.7633721775 | 0.7633721775 | 0.2500000000 | -230.70  | 0.6438  |
| O              | 0.2633721485 | 0.7366278225 | 0.2500000000 | -230.70  | 0.6438  |
| O              | 0.2366278365 | 0.2366278365 | 0.2500000000 | -230.70  | 0.6438  |
| O              | 0.7633721775 | 0.2366278365 | 0.7500000000 | -230.70  | 0.6438  |
| O              | 0.7366278225 | 0.7366278225 | 0.7500000000 | -230.70  | 0.6438  |
| O              | 0.2366278365 | 0.7633721775 | 0.7500000000 | -230.70  | 0.6438  |
| O              | 0.7366278225 | 0.2633721485 | 0.2500000000 | -230.70  | 0.6438  |
| O              | 0.0000000000 | 0.5000000000 | 0.9969324199 | -339.07  | -0.0343 |
| O              | 0.5000000000 | 0.0000000000 | 0.5030675801 | -339.07  | -0.0343 |
| O              | 0.0000000000 | 0.5000000000 | 0.4969324499 | -339.07  | -0.0343 |
| O              | 0.5000000000 | 0.0000000000 | 0.0030675531 | -339.07  | -0.0343 |
| V <sub>x</sub> | 5.303352239  | 0.0000000000 | 0.0000000000 |          |         |
| V <sub>y</sub> | 0.0000000000 | 5.303352239  | 0.0000000000 |          |         |
| V <sub>z</sub> | 0.0000000000 | 0.0000000000 | 7.879632196  |          |         |

**Table S23.** Atomic crystallographic positions with vectors lattice in Angstrom of Y<sub>2</sub>O<sub>3</sub> with total chemical shift  $\sigma$  in ppm and quadrupolar coupling constant  $C_Q$  in MHz for each element.

| Atom           | x             | y             | z             | $\sigma$ | $C_Q$   |
|----------------|---------------|---------------|---------------|----------|---------|
| Y              | 0.2501036251  | 0.2170993921  | 0.4999968066  | 1916.78  | -1.4667 |
| Y              | 0.2826985160  | 0.5000174372  | 0.7498607538  | 1916.98  | -1.4618 |
| Y              | 0.4999968066  | 0.2501036251  | 0.2170993921  | 1916.78  | -1.4667 |
| Y              | 0.2170993921  | 0.4999968066  | 0.2501036251  | 1916.78  | -1.4667 |
| Y              | 0.5000174372  | 0.7498607538  | 0.2826985160  | 1916.98  | -1.4618 |
| Y              | 0.7498607538  | 0.2826985160  | 0.5000174372  | 1916.98  | -1.4618 |
| Y              | 0.2501373667  | 0.2827108888  | -0.0000011625 | 1917.12  | -1.4619 |
| Y              | 0.2170434680  | 0.0000226436  | 0.7498551142  | 1916.76  | -1.4626 |
| Y              | -0.0000011625 | 0.2501373667  | 0.2827108888  | 1917.12  | -1.4619 |
| Y              | 0.2827108888  | -0.0000011625 | 0.2501373667  | 1917.12  | -1.4619 |
| Y              | 0.0000226436  | 0.7498551142  | 0.2170434680  | 1916.76  | -1.4626 |
| Y              | 0.7498551142  | 0.2170434680  | 0.0000226436  | 1916.76  | -1.4626 |
| Y              | -0.0000000000 | -0.0000000000 | 0.5000000000  | 1961.31  | 2.7647  |
| Y              | 0.0000000000  | 0.0000000000  | 0.0000000000  | 1961.30  | 2.7675  |
| Y              | 0.5000000000  | -0.0000000000 | -0.0000000000 | 1961.31  | 2.7647  |
| Y              | -0.0000000000 | 0.5000000000  | -0.0000000000 | 1961.31  | 2.7647  |
| Y              | 0.7498626333  | 0.7172891112  | 0.0000011625  | 1917.12  | -1.4619 |
| Y              | 0.7829565320  | -0.0000226436 | 0.2501448858  | 1916.76  | -1.4626 |
| Y              | 0.0000011625  | 0.7498626333  | 0.7172891112  | 1917.12  | -1.4619 |
| Y              | 0.7172891112  | 0.0000011625  | 0.7498626333  | 1917.12  | -1.4619 |
| Y              | -0.0000226436 | 0.2501448858  | 0.7829565320  | 1916.76  | -1.4626 |
| Y              | 0.2501448858  | 0.7829565320  | -0.0000226436 | 1916.76  | -1.4626 |
| Y              | 0.7498963749  | 0.7829006079  | 0.5000031934  | 1916.78  | -1.4667 |
| Y              | 0.7173014840  | 0.4999825628  | 0.2501392462  | 1916.98  | -1.4618 |
| Y              | 0.5000031934  | 0.7498963749  | 0.7829006079  | 1916.78  | -1.4667 |
| Y              | 0.7829006079  | 0.5000031934  | 0.7498963749  | 1916.78  | -1.4667 |
| Y              | 0.4999825628  | 0.2501392462  | 0.7173014840  | 1916.98  | -1.4618 |
| Y              | 0.2501392462  | 0.7173014840  | 0.4999825628  | 1916.98  | -1.4618 |
| Y              | 0.5000000000  | 0.5000000000  | 0.0000000000  | 1961.68  | 2.7690  |
| Y              | 0.5000000000  | 0.5000000000  | 0.5000000000  | 1961.60  | 2.7633  |
| Y              | 0.0000000000  | 0.5000000000  | 0.5000000000  | 1961.68  | 2.7690  |
| Y              | 0.5000000000  | 0.0000000000  | 0.5000000000  | 1961.68  | 2.7690  |
| O              | 0.4017136693  | 0.3592795451  | 0.8700777365  | -159.87  | 0.3196  |
| O              | 0.5982534749  | 0.1407473419  | 0.8700480851  | -159.83  | 0.3166  |
| O              | 0.9016459018  | 0.1407371287  | 0.1299571461  | -159.83  | 0.3200  |
| O              | 0.8700480851  | 0.5982534749  | 0.1407473419  | -159.83  | 0.3166  |
| O              | 0.3592795451  | 0.8700777365  | 0.4017136693  | -159.87  | 0.3196  |
| O              | 0.3592374423  | 0.1298994264  | 0.0983965811  | -159.85  | 0.3222  |
| O              | 0.1298994264  | 0.0983965811  | 0.3592374423  | -159.85  | 0.3222  |
| O              | 0.1407473419  | 0.8700480851  | 0.5982534749  | -159.83  | 0.3166  |
| O              | 0.1299571461  | 0.9016459018  | 0.1407371287  | -159.83  | 0.3200  |
| O              | 0.1407371287  | 0.1299571461  | 0.9016459018  | -159.83  | 0.3200  |
| O              | 0.8700777365  | 0.4017136693  | 0.3592795451  | -159.87  | 0.3196  |
| O              | 0.0983965811  | 0.3592374423  | 0.1298994264  | -159.85  | 0.3222  |
| O              | 0.0982434799  | 0.1407727324  | 0.6299450373  | -159.91  | 0.3200  |
| O              | 0.9015970189  | 0.3592513028  | 0.6299536863  | -159.97  | 0.3223  |
| O              | 0.5982819951  | 0.3592302364  | 0.3700825044  | -159.92  | 0.3189  |
| O              | 0.6299536863  | 0.9015970189  | 0.3592513028  | -159.97  | 0.3223  |
| O              | 0.4016352869  | 0.1407354877  | 0.3700571989  | -159.93  | 0.3165  |
| O              | 0.6299450373  | 0.0982434799  | 0.1407727324  | -159.91  | 0.3200  |
| O              | 0.3592302364  | 0.3700825044  | 0.5982819951  | -159.92  | 0.3189  |
| O              | 0.3700825044  | 0.5982819951  | 0.3592302364  | -159.92  | 0.3189  |
| O              | 0.3592513028  | 0.6299536863  | 0.9015970189  | -159.97  | 0.3223  |
| O              | 0.3700571989  | 0.4016352869  | 0.1407354877  | -159.93  | 0.3165  |
| O              | 0.1407354877  | 0.3700571989  | 0.4016352869  | -159.93  | 0.3165  |
| O              | 0.1407727324  | 0.6299450373  | 0.0982434799  | -159.91  | 0.3200  |
| O              | 0.9017565121  | 0.8592272826  | 0.3700549627  | -159.91  | 0.3200  |
| O              | 0.0984029731  | 0.6407486972  | 0.3700463137  | -159.97  | 0.3223  |
| O              | 0.4017180049  | 0.6407697636  | 0.6299174956  | -159.92  | 0.3189  |
| O              | 0.3700463137  | 0.0984029731  | 0.6407486972  | -159.97  | 0.3223  |
| O              | 0.8592272826  | 0.3700549627  | 0.9017565121  | -159.91  | 0.3200  |
| O              | 0.8592645273  | 0.6299428011  | 0.5983647131  | -159.93  | 0.3165  |
| O              | 0.6299428011  | 0.5983647131  | 0.8592645273  | -159.93  | 0.3165  |
| O              | 0.6407486972  | 0.3700463137  | 0.0984029731  | -159.97  | 0.3223  |
| O              | 0.6299174956  | 0.4017180049  | 0.6407697636  | -159.92  | 0.3189  |
| O              | 0.6407697636  | 0.6299174956  | 0.4017180049  | -159.92  | 0.3189  |
| O              | 0.3700549627  | 0.9017565121  | 0.8592272826  | -159.91  | 0.3200  |
| O              | 0.5983647131  | 0.8592645273  | 0.6299428011  | -159.93  | 0.3165  |
| O              | 0.5982863307  | 0.6407204549  | 0.1299222635  | -159.87  | 0.3196  |
| O              | 0.4017465251  | 0.8592526731  | 0.1299519149  | -159.83  | 0.3166  |
| O              | 0.0983540902  | 0.8592628863  | 0.8700428539  | -159.83  | 0.3200  |
| O              | 0.1299519149  | 0.4017465251  | 0.8592526731  | -159.83  | 0.3166  |
| O              | 0.9016034109  | 0.6407625577  | 0.8701005736  | -159.85  | 0.3222  |
| O              | 0.1299222635  | 0.5982863307  | 0.6407204549  | -159.87  | 0.3196  |
| O              | 0.8592628863  | 0.8700428539  | 0.0983540902  | -159.83  | 0.3200  |
| O              | 0.8700428539  | 0.0983540902  | 0.8592628863  | -159.83  | 0.3200  |
| O              | 0.8592526731  | 0.1299519149  | 0.4017465251  | -159.83  | 0.3166  |
| O              | 0.8701005736  | 0.9016034109  | 0.6407625577  | -159.85  | 0.3222  |
| O              | 0.6407625577  | 0.8701005736  | 0.9016034109  | -159.85  | 0.3222  |
| O              | 0.6407204549  | 0.1299222635  | 0.5982863307  | -159.87  | 0.3196  |
| V <sub>x</sub> | 10.672742819  | 0.000204190   | 0.000204190   |          |         |
| V <sub>y</sub> | 0.000204190   | 10.672742819  | 0.000204190   |          |         |
| V <sub>z</sub> | 0.000204190   | 0.000204190   | 10.672742819  |          |         |

## References

- Hou, D.; Zhang, F.; Ji, C.; Hannon, T.; Zhu, H.; Wu, J.; Levitas, V.I.; Ma, Y. Phase transition and structure of silver azide at high pressure. *Journal of Applied Physics* **2011**, *110*, 023524.
- Jones, P.G.; Rumpel, H.; Schwarzmann, E.; Sheldrick, G.M.; Paulus, H. Gold(III) oxide. *Acta Cryst B* **1979**, *35*, 1435–1437.
- Hoffman, C.W.W.; Ropp, R.C.; Mooney, R.W. Preparation, Properties and Structure of Cadmium Peroxide. *J. Am. Chem. Soc.* **1959**, *81*, 3830–3834.
- Hill, A.H.; Harrison, A.; Dickinson, C.; Zhou, W.; Kockelmann, W. Crystallographic and magnetic studies of mesoporous eskolaite, Cr<sub>2</sub>O<sub>3</sub>. *Microporous and Mesoporous Materials* **2010**, *130*, 280–286.
- Aurivillius, K.; Rossotti, H.; Theorell, H.; Thorell, B. The Crystal Structure of Mercury(II)oxide Studied by X-Ray and Neutron Diffraction Methods. *Acta Chem. Scand.* **1956**, *10*, 852–866.
- Yu, R.; Zhan, Q.; De Jonghe, L.C. Crystal Structures of and Displacive Transitions in OsN<sub>2</sub>, IrN<sub>2</sub>, RuN<sub>2</sub>, and RhN<sub>2</sub>. *Angewandte Chemie International Edition* **2007**, *46*, 1136–1140.
- Krsmanovic Whiffen, R.M.; A., Z.; Speghini, A.; Brik, M.G.; Bartova, B.; Bettinelli, M.; Dramicanin, M.D. Structural and spectroscopic studies of Eu<sup>3+</sup> doped Lu<sub>2</sub>O<sub>3</sub>-Gd<sub>2</sub>O<sub>3</sub> solid solutions. *Optical Materials* **2014**, *36*, 1083–1091.
- A new modification of ReO<sub>3</sub>-type MoO<sub>3</sub> and the deuterated intercalation compound from which it is derived: D<sub>0.99</sub>MOO<sub>3</sub>.
- Gatehouse, B.M.; Wadsley, A.D. The crystal structure of the high temperature form of niobium pentoxide. *Acta Cryst* **1964**, *17*, 1545–1554.
- Ueki, T.; Zalkin, A.; Templeton, D.H. The crystal structure of osmium tetroxide. *Acta Cryst* **1965**, *19*, 157–160.
- HOEKSTRA, H.R.; SIEGEL, S.; GALLAGHER, F.X. Reaction of Platinum Dioxide with Some Metal Oxides; 1971; Vol. 98, pp. 39–53.
- Krebs, B.; Mueller, A.; Beyer, H.H. Crystal structure of rhenium(VII) oxide. *Inorg. Chem.* **1969**, *8*, 436–443.
- Umamoto, K.; Wentzcovitch, R.M. Effect of the d electrons on phase transitions in transition-metal sesquioxides. *Phys Chem Minerals* **2011**, *38*, 387–395.
- Ly, F.; Sheikin, I.; Grenier, B.; Huxley, A.D. Magnetic Field-Induced Superconductivity in the Ferromagnet URhGe. *Science* **2005**, *309*, 1343–1346.
- Schleid, T.; Meyer, G. Single crystals of rare earth oxides from reducing halide melts. *Journal of the Less Common Metals* **1989**, *149*, 73–80.
- Zibrov, I.P.; Filonenko, V.P.; Sundberg, M.; Werner, P.E. Structures and phase transitions of B-Ta<sub>2</sub>O<sub>5</sub> and Z-Ta<sub>2</sub>O<sub>5</sub>: two high-pressure forms of Ta<sub>2</sub>O<sub>5</sub>. *Acta Cryst B* **2000**, *56*, 659–665.
- Krebs, B. Technetium(VII)-oxid: Ein Übergangsmetalloxid mit Molekülstruktur im festen Zustand. *Zeitschrift für anorganische und allgemeine Chemie* **1971**, *380*, 146–159.
- Shklover, V.; Haibach, T.; Ried, F.; Nesper, R.; Novak, P. Crystal Structure of the Product of Mg<sup>2+</sup> Insertion into V<sub>2</sub>O<sub>5</sub> Single Crystals. *Journal of Solid State Chemistry* **1996**, *123*, 317–323.
- Locherer, K.R.; Swainson, I.P.; Salje, E.K.H. Transition to a new tetragonal phase of WO<sub>3</sub>: crystal structure and distortion parameters. *J. Phys.: Condens. Matter* **1999**, *11*, 4143–4156.
- Coduri, M.; Scavini, M.; Allieta, M.; Brunelli, M.; Ferrero, C. Defect Structure of Y-Doped Ceria on Different Length Scales. *Chem. Mater.* **2013**, *25*, 4278–4289.
